# Supplementary material
Source: publisher figshare collection journal article supplement (https://gsapubs.figshare.com/articles/dataset/_/14047025)
Supplement: Supplementary file 1 [file 1]

## Sheet: Contents
Table of Contents
This workbook includes a synthesis of magnetostratigraphic analysis of borehole DH1, from Svalbard, Norway. The paleomagnetic data were interpreted independently by at least four people including Y. Z., J. O., M. H. and D.M with a conservative comprise reached during later discussion. These polarity interpretations as well as the lithostratigraphic decriptions of each section are also contained i…
Table DR1. Compiled geochronology data from latest Jurassic to Early Cretaceous shown in Figure 1 of the main text
Table DR2. Svalbard SH1 paleomagnetic sample descriptions, brief interpretations of each demagnetization result, characteristeric directions (ChRM) and polarity rating
Table DR3. Demganetization steps of each sample
Table DR4. Thermal demagnetization data of orthogonal IRMs
Table DR5. Ages for three proposed markers for defining the Barremian-Aptian boundary

## Sheet: G48591
Zhang, Y., et al., 2021, Magnetostratigraphy of U-Pb–dated boreholes in Svalbard, Norway, implies that magnetochron M0r (a proposed Barremian-Aptian boundary marker) begins at 121.2 ± 0.4 Ma: Geology, v. 49, https://doi.org/10.1130/G48591.1

## Sheet: TableDR1-Fig1 ref
Table DR1. Compiled geochronology data from latest Jurassic to Early Cretaceous shown in Figure 1 of the main text
Reference number	Age (Ma)*	Locality	Analysis type	Reference
[1]	113.08 ± 0.14	Germany	U/Pb	Selby, D., Mutterlose, J., and Condon, D.J., 2009, U/Pb and Re/Os geochronology of the Aptian/Albian and Cenomanian/Turonian stage boundaries; implications for timescale calibration, osmium isotope sea water composition and Re-Os systematics in organic-rich sediments: Chemical Geology: v. 265, p. 394–409. https://doi.org/10.1016/j.chemgeo.2009.05.005.
[2]	122.18 ± 1.43; 125.45 ± 0.43	MIT Guyot	40Ar/39Ar	Pringle, M., and Duncan, R., 1995, Radiometric ages of basement lavas recovered at Loen, Wodejebato, MIT, and Takuyo-Daisan Guyots, northwestern Pacific Ocean. Proceedings of the Ocean Drilling Program: Scientific Results, v. 144, p. 547–557.
[3]	124.07 ± 0.24; 133.51 ± 0.29; 137.62 ± 0.21; 138.46 ± 0.29	Great Valley Group of California	U/Pb	Shimokawa, A., 2010, Zircon U-Pb Geochronology of the Great Valley Group: Recalibrating the Lower Cretaceous Time Scale [M.S. thesis]: University of North Carolina at Chapel Hill, 46 p.
[4]	124.32 ± 1.80	Ontong Java Plateau	40Ar/39Ar	Chambers, L.M., Pringle, M.S., and Fitton, J.G., 2004, Phreatomagmatic eruptions on the Ontong Java Plateau; an Aptian 40Ar/39Ar age for volcaniclastic rocks at ODP Site 1184. In: Fitton, J.G., Mahoney, J.J., Wallace, P.J., Sanders, A.D. (Eds.), Origin and Evolution of the Ontong Java Plateau: Geological Society Special Publications, v. 229, p. 325–331. https://doi.org/10.1144/GSL.SP.2004.229.01.…
[5]	125.98 ± 2.87	Ontong Java Plateau	40Ar/39Ar	Tejada, M., Mahoney, J., Neal, C., Duncan, R., and Petterson, M., 2002, Basement geochemistry and geochronology of Central Malaita, Solomon Islands, with implications for the origin and evolution of the Ontong Java Plateau: Journal of Petrology, v. 43, p. 449–484. https://doi.org/10.1093/petrology/43.3.449.
[6]	132.50 ± 1.30	Argentina	U/Pb	Aguirre-Urreta, M.B., Pazos, P.J., Lazo, D.G., Mark Fanning, C., and Litvak, V.D., 2008, First U–Pb SHRIMP age of the Hauterivian stage, Neuquén Basin, Argentina: Journal of South American Earth Sciences v. 26, p. 91–99. https://doi.org/10.1016/j.jsames.2008.01.001.
[7]	146.48 ± 1.63	Shatsky Rise	40Ar/39Ar	Mahoney, J.J., Duncan, R.A., Tejada, M.L.G., Sager, W.W., and Bralower, T.J., 2005, Jurassic-Cretaceous boundary age and mid-ocean-ridge–type mantle source for Shatsky Rise: Geology, v. 33, p. 185–188. https://doi.org/10.1130/G21378.1
[8]	122.01 ± 0.52	Reversed-polarity basalt in North China (uncertain biostratigraphic age)	40Ar/39Ar	He, H., Pan, Y., Tauxe, L., Qin, H., and Zhu, R., 2008, Toward age determination of the M0r (Barremian-Aptian boundary) of the Early Cretaceous: Physics of the Earth and Planetary Interiors, v. 169, p. 41–48. http://dx.doi.org/10.1016/j.pepi.2008.07.014.
[9]	123.10 ± 0.30	Svalbard	U/Pb [ID-TIMS]	Midtkandal, I., et al., 2016, The Aptian (Early Cretaceous) oceanic anoxic event (OAE1a) in Svalbard, Barents Sea, and the absolute age of the Barremian-Aptian boundary: Palaeogeography, Palaeoclimatology, Palaeoecology, v. 463, p. 126-135. https://doi.org/10.1016/j.palaeo.2016.09.023.
[10]	127.42 ± 0.15; 129.09 ± 0.16	Argentina	U/Pb [ID-TIMS]	Aguirre-Urreta, B., Lescano, M., Schmitz, M.D., Tunik, M., Concheyro, A., Rawson, P.F., and Ramos, V.A., 2015, Filling the gap: new precise Early Cretaceous radioisotopic ages from the Andes: Geological Magazine, v. 152, p. 557–564. http://dx.doi.org/10.1017/S001675681400082X.
[11]	130.39 ± 0.16	Argentina	U/Pb [ID-TIMS]	Aguirre-Urreta, B., Schmitz, M., Lescano, M., Tunik, M., Rawson, P.F., Concheyro, A., Buhler, M., Ramos, V.A., 2017, A high precision U-Pb radioisotopic age for the Agrio Formation, Neuquén Basin, Argentina: implications for the chronology of the Hauterivian Stage: Cretaceous Research, v. 75, p. 193–204. https://doi.org/10.1016/j.cretres.2017.03.027.
[12]	139.24 ± 0.16; 139.96 ± 0.17; 140.34 ± 0.18; 142.04 ± 0.17; 147.11 ± 0.18	Argentina	U/Pb [ID-TIMS]	Lena, L., López-Martínez, R., Lescano, M., Aguirre-Urreta, B., Concheyro, A., Vennari, V., Naipauer, M., Samankassou, E., Pimentel, M., Ramos, V., and Schaltegger, U., 2019, High-precision U-Pb ages in the early Tithonian to early Berriasian and implications for the numerical age of the Jurassic/Cretaceous boundary: Solid Earth, v. 10, p. 1–14. https://doi.org/10.5194/se-10-1-2019.
[13]	139.55 ± 0.16	Argentina	U/Pb [ID-TIMS]	Vennari, V.V., Lescano, M., Naipauer, M., Aguirre–Urreta, B., Concheyro, A., Schaltegger, U., Armstrong, R., Pimentel, M., and Ramos, V.A., 2014, New constraints on the Jurassic–Cretaceous boundary in the High Andes using high–precision U–Pb data: Gondwana Research, v. 26, p. 374–385. https://doi.org/10.1016/j.gr.2013.07.005.

## Sheet: TableDR2-Magstrat
Table DR2. Svalbard SH1 paleomagnetic sample descriptions, brief interpretations of each demagnetization result, characteristeric directions (ChRM) and polarity rating
	Borehole DH1 (stored at UNIS; under authority of Snorre Olaussen)
	Sampling on Wed, 26 Sept and Thurs, 27 Sept, 2018, -- 110 mini-cores in just 2 days thanks to Julian Janocha (a grad student studying Carboniferous karst breccia-pipes; he is from Weisbaden, near Frankfurt)																		N-NP	NPP	N?	INT	R?	RPP	RP-R
Some General notes																			7	6	5	4	3	2	1
	Facies notes	Caroline (Aptian) is no longer tidal-influenced delta, but interpreted as wave-storm (hummocky in outcrop) shelf with some tidal influence.
		In our drilled samples, it still looked mainly tidal-type fine-sand (crossbedded) flasers in clay-rich silt.
	Minicore "declination"	Where cross-bedding or other tilted laminations were observed; then the cores were either drilled "toward the down-dip" or "toward the up-dip"; however, not all of these were recorded in the following notes
		Snorre Olausen advised that the observed cross-bedding in just the borehole might be complicated due to trough, tidal and wave effects. The deltas were prograding to Southeast (see thesis)
		Otherwise, the "top" scribe line was usually at "top" of core-segment as seen in box => "direction" is toward storage "down" = direction of PF.
		Therefore, NRMs should have 3 clusters -- PF, "up-dip" and "down-dip"; plus random rotations due to handling before marking
	Lithification	All facies are very well lithified; indeed, lowest sandstone was nearly quartzite (and lowest sand minicoring broke another piece from drill bit; therefore abandoned.
		Pre-uplift in earliest Paleocene; there had been a great thickness of Upper Cretaceous; but that was ALL eroded during earliest Paleocene
		Snorre Olausen advised that most original Smectite was transformed to Illite due to depth of burial and thermal gradient. Therefore, even clayey silt is well-cemented.
		Mid-Paleocene (ca. 60 Ma) is oldest date at base of return of sediments. At that time, it was an eroded peneplain with low hills
		Hills had forested peat; and this peat mire "crept down" the slopes to accumulate organic-rich deposits (now coal) in depressions; until landscape was flattened
		Eocene was now flat, with a beach nearby. Peat mires, some raised, are the main coal horizons being mined.
	Sandstone composition trend	The Sandstone character changes from more quartz to more volcaniclastic-bearing at the time of the bentonite in other boreholes.
		We sent Snorre Olaussen cut-pieces from the sands, so they can make thin-sections to pinpoint this change in DH1, therefore providing a better projection of the dated bentonite
	Borehole suite	Borehole DH1 drilling had been halted in Triassic (?) due to hitting a fault; therefore DH2 was about 10m from it. DH2 (called DH1a on boxes and in the thesis) has the palynology study, but not DH1.
		But, DH1a also had problems; therefore the drilling was moved about 8 km away, where boreholes DH3-DH7 were drilled in a 10-m spacing array to test CO2 sequestration feasibility
		Until last Tuesday, those DH3-DH7 set was stored at that other remote drillsite area; but now moved to UNIS.
		Snorre was a bit annoyed that the C13 study was on DH1, rather than DH2 (they sampled without getting his advice), because it is not absolutely sure how the palynology sampling fits to the C13 anomaly.
		LOGS -- great detail (Gamma has nearly 1cm spacing in DH1 below the upper 50m!).
		Jur-Cret boundary being narrowed, because Palynology is giving different results from Ammonites (done by M. Rogov); but cores broke into about 2-cm slices upon drying => not the easiest for Pmag sampling. Homogeneous-looking dark clay facies.
Paleomag	Core current location at ~78ºN/~22ºE; Mag Incl ~82º/Decl ~13.8º;
	Paleo-latitude: According to paleogeography reconstructions by Torsvik/Scotese/Stampli, a paleo-latitude of ~63-66ºN is suggested; therefore a slightly shallower mag. incl. of ~75º is expected from the ChRM directions
	A "storage overprint"? -- (north)East/horizontal vector, which could be removed by 10/15 mT or ca. 125/150C
	A permanent Brunhes component to exists in many samples.
	AF -- 2G seems not working efficiently or correctly for fields over 30 mT, and imparting some spurious magnetic field to specimens -- a majority turned crazy afterwards and gaining int. rather than decreasing
Total = 110 samples;
	11 are "pairs" to run comparative thermal/AF demag						Brunhes inc=~84 deg				HALIP inc ~ 63 deg					ChRM Dec			along E-W axis				Final ChRM dec, incs
	7 samples are upside down, including 150.8, 158.1, 158.15, 162.35, 171.65, 180.45, and 180.9							Brunhes								re-oriented using Brunhes	OK		Storage				dec	inc	code	VGP	ChRM
			Polarity & ratings								ChRM Line (Cretaceous)															for final polarity interpretation
Meters	Mag. Susc. (SI unit)	Very Brief Litho-Description		mag-zone	polarity rating		Steps used	dec	inc	a95	rho	Steps used	dec	inc	a95/MAD	Dec		comments	Steps used	dec	inc	a95				lat	inc
130.1		Silt, semi-bioturbated	NP	D0n	7		212-228	219	71	9	2	L-N	9	61	11.2	150	no		B-G	31	17	12	150	61	no		61
131.45	25.6	Medium-grained sand layer (131.35-131.95 is especially sandy)	N?		5		A-D	329	44	18	10	J-KM-O-@	354	50	10	25	yes						25	50	yes	71.6
132.35	27.6	Fine-grained sand and dark silt; looks tidal-influenced	NP		7		none only chrm					E-H-@	284	56	1.4		nb						284	56	nb		56
133.45	62.4	Darker "tidal-influenced", below homogeneous sand layer of 133.1-133.3	NP		7		none only chrm					H-J-@	340	80	2.2		nb						340	80	nb		80
134.3	72.1	PAIR -- Tidal-looking sand and silt	N		7		125-325	328	64	24	4	K-M-@	123	58	12	142.5	no						142.5	58	no		58
134.35	74.6	Tidal-looking sand and silt; Dark	N		7		D-T	353	77	9	6.5	V-c-@	283	71	5	302.5	yes						302.5	71	yes	46.2
135.5	26.6	Dark silt with fine-grained sand stringers; which would seem to be tidal-shelf. But with some thick (ca. 25-30cm) intervals of coarse- to medium-grained sands, homogenous (storm beds?) - Not Sampled	N		7													no sample	A-E
136.3	27.4	Dark silt with fine-grained sand stringers	N		7			9	77	15	5	L-Q-@	271	54	6	262	no	accidently labeled as 135.5		305	29	13	262	54	no		54
137.45	28.3	Dark silt with fine-grained sand stringers	N		7		A-F	12	69	4	1.2	M-S-@	55	72	2	43	yes						43	72	yes	70.9
138.55	17.5	PAIR -- Dark silt with fine-grained sand stringers	N		7		none only chrm				5		271	54	6		nb		A-H	331	32	8	271	54	nb		54
138.6	27	Dark silt with fine-grained sand stringers	N		7		B-D	30	83	39	5	M-Q-@	345	31	12	315	yes						315	31	yes	32.1
139.5	18.5	Dark silt with fine-grained sand stringers	N		7		none only chrm					I-JM-@	299	57	7.3		nb						299	57	nb		57
140.2	26	Dark gray silt with light gray fine-grained sand stringers	N		7		none only chrm				7	I-O-@	30	69	13		nb		A-D	284	22	29	30	69	nb		69
141.2	21.3	Dark gray silt with very thin light laminations. Broken into three parts along lamination with one outer part missing. A swing of slightly coarser and compressed body was found embedded in the broken plane	N		7		none only chrm					H-J-@	202	67	6.1		nb						202	67	nb		67
142.15	27.4	Dark gray silt with slightly tilted (mini-core top to bottome) light laminations. Quite homogenous; lower corner is coarser grained sands/conglomerate. Broken along horizontal plane	N		7		0-241	314	68	15	5	I-T-@	205	52	12	251	no						251	52	no		52
143.25	30.4	Dark gray silt with slightly tilted (same as 142.15) lighter laminations. Homogenous	N		7		none only chrm					G-I-@	261	74	6.3		nb						261	74	nb		74
144.2	30.4	CAROLINE Fm Base. Dark silt with similarly tilted light laminations. One distinctive layer has relatively coarser grains and seemingly black coal seam at the bottom of the mini-core	N		7		none only chrm					L-O-@	312	58	17.2		nb						312	58	nb		58
144.55	12.1	HELVETIA Fm Top. PHOTO at 144.45 = 5-cm layer of Fine-Pebble Conglomerate ("flooding surface" in log).	N		7		none only chrm				5	R-@	195	75			nb		A-E	92	29	19	195	75	nb		75
145.2	14.1	Sandy silt; semi-bioturbated	NP		7		none only chrm					E-FH-@	222	36	14.5		nb						222	36	nb		36
146.35	11.8	Sandy silt. Oddly STEEP "dip" to tidal(?) reworked. Sample drilled "down-dip". Maybe synsedimentary slump deposit?	N		7		none only chrm					F-I-@	42	63	16.8		nb						42	63	nb		63
147.6	60.7	Dark fine-grained sand to silt; homogeneous. Between tidal-marsh facies?	N		7		none only chrm				1	D-S-@	198	69	2		nb		A-D	264	32	17	198	69	nb		69
148.8	23.1	Sandy-silt, bioturbated. Between tidal-laminated intervals	R		1		none only chrm					F-G-@	177	-51	23.6		nb						177	-51	nb		-51
149.9	14.1	Sandy-silt, bioturbated. Just above tidal-laminated	R?		3		100-229	205	54	12	7	none
150.8	340.5	Dark brown-gray silt, bioturbated	N		7		none				1	F-L-@	116	59	10		nb	inc inverted	A-D	312	11	43	116	59	nb		59
152	29.5	Dark silt. Narrow borehole core = drilling problem?	N		7		100-400	233	84	9	7	H-J-@	225	74	3.1		nb						225	74	nb		74
152.8	7.4	PAIR -- Fine-grained sand, bioturbated, with anastomosing. Op of the fining-upward sand of sample 153.25 interval	NPP		6							L-MO-@	113	43	19		nb	inc inverted					113	43	nb		43
152.85	3.1	Fine-grained sand	N	153.875	7		0-100	278	52	24	8	H-L	50	63	23	154.5	no	bad Brun					154.5	63	no		63
153.25	4.7	Medium-grained sand; half-way up sand interval.	INT	D0r	4
154.9	-2.6	Coarse sand, homogeneous	RPP		2		none only chrm					E-@	215.3	-60.9	-														Mean inclination for all ChRM incs:
155.7	22.3	Fine-grained sand layer between coarse-grained (it is the fininig-up top). Has wispy dark clay. Coarse-grained sand begins about 5cm higher	RP		1		none only chrm					F-H-@	258	-27	2.7		nb						258	-27	nb		-27		Using Likelyhood Function, Dispersion= 82.3
156	2.2	Base of sand, of which 155.7 is the fine-grained top; just above 5-cm Coal. Drilled "Down-dip" (direction toward which current was flowing in cross-bed).	NP		7		none only chrm					H-I-@	264	66	6.8		nb						264	66	nb		66		Marginal Likelyhood Estimate is probably best
156.4	7.3	2nd-pass. Very dark silt. Skipped 155 sand, as too hard to drill with the failing drill-press bit	NP		7		B-G	255	85	9	8	G-N-@	274	54	6	19	yes						19	54	yes	76.6			Inclination= 59.2°, k= 7.14, n= 82, Alpha95= 4.6
157.2	12.8	2nd-pass. Very dark silt. Interval of ca. 156.1-157.2m = organic-rich silt with some coal horizons.	RPP		2		208-500	266	40	6		N-OQ-@	217	-27	16.7		nb		A-C	264	15	10	217	-27	nb		-27		Marginal Likelyhood function estimates, Inc= 57.8, Alpha95(+)= 18.5, Alpha95(-) = 6.0
157.4	11.8	Looks like siltstone; dark gray. Fining-upward to the "organic-rich silt with some coal"	INT		4
157.9	7	2nd-pass. Grey sandy-silt, with some current lamination	INT		4																											76.3	51.8
158.1	4.1	PAIR -- Tidal-type reworked sands; no cross-bedding, only anastomosing. Is fining-upward to the "157.4" type siltstone	R		1		0-12	281	63	19	10	K-O-@	156	-47	22	101	no	inc inverted					101	-47	no		-47		all the good (yes directions)
158.15	5.4	Tidal-type reworked sands	R		1		B-E	55	62	1	7	L-O	203	-63	23	148	yes	inc inverted; alt at 225?					148	-63	yes	-57.5			Normal Polarity Directions:
158.7	3.6	2nd-pass. Medium-grained sand	RPP		2		0-150	337	73	29	10		55	-36	21	78	no						78	-36	no		-36			Declination= 23.3°, Inclination= 63.6°, Alpha(95%)= 12.8°, k= 8.76, n= 17
159.1	1.1	PAIR -- Coarse-grained sands	INT		4																									R= 15.1732, R-bar= 0.8925, Standard error=0.11937, Spherical Variance= 0.10746, csd(37%)= 27.37°, csd(5%)= 47.31°
159.15	-2.2	Coarse-grained sands	R?		3		0-150	337	73	29		E-G	180	-18	27	203	no						203	-18	no	-51				Rayleigh Test: Uniformity rejected at 99% probability
159.8	1.3	2nd-pass. Medium-grained sand	RP	159.9	1		none only chrm					GI-@	57	-56	10.3		nb						57	-56	nb		-56			Fisher Model: fit acceptable (95% probability)
160	-3	PAIR -- Coarse-grained sands	N?	DH1n	5		none only chrm					G-I-@	82	36	12.3		nb						82	36	nb		36
160.05	0.6	Coarse-grained sands	N?		5		none only chrm																						Reverse Polarity Directions:
161.1	0.9	PAIR -- Coarse-grained sandstone. Drilled Down-dip with possible cross-bedding.	N?		5		none only chrm, mutch better behavior than 161.15, 1st 4 steps== storage RM?					G-I-@	39.3	34.1	11.2															Declination= 155.0°, Inclination= -67.3°, Alpha(95%)= 26.8°, k= 12.76, n= 4
161.15	-1.6	Coarse-grained sands	N?		5		none												C-E	279	10	34								R= 3.7648, R-bar= 0.9412, Standard error=0.17755, Spherical Variance= 0.05880, csd(37%)= 22.68°, csd(5%)= 39.20°
162.35	150.2	2nd-pass. Very dark silt; just below Thick coarse-grained sand unit (160-162) which was skipped for this 2nd pass, because it is probably a single fining-upward event.	NP		7							G-I-@	245	66	3.9		nb	inc inverted					245	66	nb		66			Too few points to perform Rayleigh Test
162.65	10.2	Very dark silt, organic-rich	NP		7		B-G	352	81	14	3	Q-R-@	84	47	11	92	yes						92	47	yes	29.1				Fisher Model: fit acceptable (95% probability)
163.1	7.7	2nd-pass. Medium-grained sand	INT		4
163.8	7.4	Silt to fine-grained sand, anastomosing	N		7		none only chrm					E-H-@	347	60	8.5		nb						347	60	nb		60		All directions converted to Normal Polarity:
164.3		2nd-pass. Medium-grained sand	N		7		0-204	282	82	22	8	G-I-@	163	49	10	241	no						241	49	no		49			Declination= 15.3°, Inclination= 65.5°, Alpha(95%)= 11.3°, k= 8.92, n= 21
164.7	11.1	Very dark silt with fine-grained sand stringers (or lighter-gray stringers)	N		7			174	75	13	7	q-@	237	62	10	63	yes						63	62	yes	56.8				R= 18.7579, R-bar= 0.8932, Standard error=0.10704, Spherical Variance= 0.10676, csd(37%)= 27.12°, csd(5%)= 46.87°
165.05	6.3	2nd-pass. Medium-grained sand, light gray with silt wisps (looks tidal influenced)	INT		4		none				7	G-J	271	43	12		nb		A-G	289	-29	23	271	43	nb		43			Rayleigh Test: Uniformity rejected at 99% probability
165.5	1.5	Medium-grained sand	INT		4		none				12	L-@	108	41	7		nb		A-D	309	31	11	108	41	nb		41			Fisher Model: fit acceptable (95% probability)
166.25	1.5	2nd-pass. Coarse-grained sand, light gray with silt wisps (looks tidal influenced)	N?		5		none only chrm					G-I-@	87	33	6.1		nb	inc inverted					87	33	nb		33
166.75	0.3	PAIR -- Coarse-grained sands	INT		4		0-12	170	74	17	20	none																	Mean pole	plat	plong	dp	dm	paleolat		Halvorsen et al 2012 (abstract) have HALIP pole:
166.8	2.7	Coarse-grained sands	N?		5							D-F-@	306	78	3	136	yes						136	78	yes	33.1				58.9	175.4	14.91	18.36	47.65		56.6°N, 196.3°E, dp/dm: 3.3/5.1
167.2	1.5	Very light gray coarse-grained sandstone; one side exposes black thin rims	NP		7		A-E	308	78	20	12	K-O-@	198	82	24	250	yes						250	82	yes	37.3
168.4	2.1	Very light coarse-grained sandstone with ~45º tilted (top to bottom) dark laminations	N		7		none only chrm					H-J-@	331.9	63.6	6.6														Reversal test:		obs	critcal
169.3	1.6	2nd-pass. Fine-grained sand with anastomosing dark-silt seams. Skipped thick sand of 167-168 on this 2nd pass, because it may be a single event.	NP		7		A-D	240	76	19	8	D-I	270	33	15	30	yes						30	33	yes	58				Ro	19.9	33	Simulation
169.5	0.7	coarse-grained sandstone with tilted dark materials that seemed to be tidally influenced	NP		7		100-200	79	88	13		C-D-@	257	60	8.6	178	no	alt at 250?					178	60	no		60
170.95	10.5	Very dark silt, below Coal. Siderite (Snorre says is common when near coals)	N		7		none only chrm					E-G-@	187	65	5.7		nb						187	65	nb		65
171.65	7.1	Silt, medium-dark	NP		7		none					E-FH-@	159	50	15		nb		B-D	86	1.2	28	159	50	nb		50
172.2	7.5	Cross-bed; Sampled "Down-dip"	NPP		6		100-225	309	57	17		G-I-@	225	42	15.3	276	no	GC to south path; brk=2					276	42	no		42
173.4	2.7	Dark silt	N?		5		B-G	84	71	8	12	G-L-@	124	54	21	40	yes						40	54	yes	67.4
174.2	5.9	Sandy-silt, tidal?	NP		7		C-I	11	88	22	12	O-Q-@	44	62	14	33	yes						33	62	yes	76.9
175.5	1	Coarse-grained sand	N	175.975	7		0-175	220	71		4	J-M-@	61	73	3	201	no	brk=2	E-I	35	2		201	73	no		73
176.45	1.9	PAIR -- Medium-coarse-grained sand. Sampled "Up-dip"	R?	DH1r	3		none only chrm
176.5	-2.4	Medium-coarse-grained sand	RP		1		0-100	85	54	13	4	E-G	337	-22	13	252	no	alt at 225					252	-22	no	-30.6
177.35	1.3	Coarse-grained sand, crossbedded. Sampled "Up-dip"	RP		1		none only chrm					H-J-@	176	-9	7.3		nb						176	-9	nb		-9
178.4	1	Coarse-grained sand, crossbedded. Sampled "Up-dip"	R		1		225-304	63	71	16	7	C-D-@	261	-2	0.2	198	no	inc inverted					198	-2	no	-43.3
179.7	2	Coarse-grained sand, crossbedded. Sampled "DOWN-dip"	RPP		2		none only chrm					B-@	54	-15	-		nb						54	-15	nb		-15
180.45	215.4	Dark-REDDISH brown-gray, very-fine silt, homogeneous	INT		4
180.9	7.8	Dark silt	R		1		175-225	291	63	23	4	N-O	269	-57	9	338	no	inc inverted; af removed; brk=2					338	-57	no		-57
181.7	2.5	Medium-grained sand; tidal structures	N?		5		none only chrm					F-H-@	244	50	17.3		nb	inc inverted					244	50	nb		50
182.55	5.5	Dark silt; tidal structures	RP		1		none only chrm					G-HJ-@	8	-21	18.4		nb						8	-21	nb		-21
183.5	9.1	Dark silt -- lowest piece in "core gap"; Drilled "Down-dip" (but subtle cross-bedding)	INT		4
184.3	-2.6	Medium-grained sand, top of thick bed of sand. Drilled "Up-dip"	RP		2		0-125	310	64			F-H-@	6	-40	14.9	56	no	none in SE area					56	-40	no		-40
185.1	0.8	Medium-grained sand	R		1		none only chrm					J-L-@	159	-41	25.1		nb						159	-41	nb		-41
186.75	4	Dark silt -- Top of fining-upward thick sand unit (which has sample 187.1 also)	RP		1		none only chrm					I-J-@	323	-31	13.8		nb						323	-31	nb		-31
187.1	5.6	Medium-grained sand; upper-middle of thick sand unit	RP		1		0-150	253	82	21	10	h-j-@	318	-25	12	65	no						65	-25	no		-25
188.45	9	Brownish-gray sandy-silt (with stringers)	N?		5		100-225	286	62	24	15	K-M	205	39	22	279	no						279	39	no		39
189.1	233.2	Brownish-gray silt -- top of fining-up 60-cm-thick sand	R?		3		none only chrm
189.8	12.6	Dark silt; just below the base of fining-up sand (which had 189.1 at top)	R?		3		none only chrm
190.9	17.6	Dark silt, bioturbated	R		2		0-12?	11	70	26	18	L-M-@	2	-42	7	351	no	poor brun?					351	-42	no		-42
191.7	14	Silt; bioturbated to tidal	NPP		6		none				2.5	L-P-@	270	63	3.9		nb		A-C	267	-7	6	270	63	nb		63
192.5	18.4	Silt, slightly brownish-tint to the gray; bioturbated	INT		4
193.65	26.5	PAIR -- Brown-tinged grey silt	INT		4		16-37	301	62	16	5	none						poor tr to r?	A-E	313	-6	14
193.75	40.6	Brown-tinged grey silt	INT		4
194.55	239.1	Sandy-silt, tidal	RPP		2		none only chrm					L@	3	-21	-		nb	inc inverted					3	-21	nb		-21
195.85	256.2	Dark silt	R?		3		A-C	318	66	42	0.6	C-K-@	155	-76	3	197	yes	inc inverted					197	-76	yes	-74.2
196.1	39.4	Medium-gray sand (darker than most, why? Seems to low for volcaniclastics)	RPP		2		0-12	350	56	29	7	D@	213	-12	-	223	no	grm >80mt					223	-12	no	-42.1
197.2	97.1	Silt-sand, with brownish-tinge to the gray. Top of fining-upward bed.	RPP	197.85	2		A-F	231	74	24	2	P-@	358	-41	19	127	yes						127	-41	yes	-31.5
198.5	158	REDDISH-Brown silt. Friable CLAY is above; and friable silt is below => not as solidly cemented interval.	NPP	DH2n	7		none only chrm				0.23	I-O-@	286	62	7		nb						286	62	nb		62
199.4	15	Sandy-silt, tidal	INT		4			105	57	9	3	none
200.4		Sandy-silt, tidal	N		7		A-F	129	69	7	7	H-J-@	118	41	20	349	yes	brk=6					349	41	yes	58
201.1	7.9	Silty-sand, bioturbated	INT		4		none if chrm=N					I-K-@	137	54	9	137	no	inverted inc;poor brun					137	54	no		54
202.05	2.1	PAIR -- Silty-sand, bioturbated	N?		5		16-37	293	74	24	7	none						poss rev??	A-D	354	14	38
202.1	9.5	Silty-sand	N		7		100-175	240	71	39	10	M-O-@	118	70	10	238	no						238	70	no		70
203.05	5.5	Silty-sand, bioturbated	NP		7		none only chrm				10	B-M	353	52			nb						353	52	nb		52
204.15	4.5	Silty-sand, bioturbated?	NP		7		A-C	303	78	24	6	G-K-@	16	41	8	73	yes						73	41	yes	38.7
205.1	8.6	Sandy-silt, bioturbated?	NP		7		A-F	4	86	12	6	H-M-@	10	56	6	6	yes						6	56	yes	76.9
206.05	11.5	Silt and fine-grained sand; bioturbated?	NP		7		A-D	216	74	33		I-K-@	256	62	12.9	40	yes						40	62	yes	72.2
207.05	-0.4	Fine-grained sand	INT	207.05	4
208.05	3.4	Silt, just above the top of a thick sand-quartzite (see Reject of 209.05)	R	DH2r	1		none				2	I-L-@	213	-73	6		yes		B-E	97	25	5	213	-73	yes	-74.9
209.05		REJECTED UPON JAMMING DRILL-PRESS -- Quartzite; middle of a thick sand interval	INT		4													no sample
210.4	7.4	Fine-grained sand, just below fine-Conglomerate (!) base of Coarse-grained quartzite. Drilled "Up-Dip"	INT		4
211.05	9.5	Fine-grained sand to silt with stringers. Drilled "Up-Dip"	N?		5		A-D	15	75	25	6	I-N-@	354	50	12	339	yes						339	50	yes	57.6
212.25	9.1	Fine-grained sand to silt with stringers. Drilled "Up-Dip"	R?		3		175-233	69	77	25	7	none
213.05	10	Silt, at top of sand-rich 25-cm bed. Drilled "Up-Dip"	R?		3		150-220	8	70	13	5	none
214.25	2	Medium-grained sand. Drilled "Up-Dip" (210-214 have a rather high "apparent dip", but not cross-bedded => these 5 samples are all oriented consistently to each other)	R?		3		100-175	252	57	11	3	none
												@= tied to origin
							Counts	50												17						25
							The data here is processed using the Kent, Briden & Mardia Linefind program (which uses the measurement uncertainty)
											rho= excess standard deviation, and a95 is the alpha 95 estimate
											range here is the demag range on the plots, which is a concatenation of AF and thermal steps
											Brk=manual break point added
											Don't get too worried by the large a95 for some of these, this is just a pecularity of using linefind and using Rho
											Rho >1 basically means that there is additional scatter beyond that due to the measurement SD

## Sheet: TableDR3-DemagData
Table DR3. Demagnetization data for each sample										Steps used for Storage component
										Steps used for Brunhes component
	data in grey italic are considered as being overly demagnetized and not viable to use									ChRM steps
										Step overlapped by Brun.&ChRM or Storage&ChRM
Step	Sample_Name (m)	Demag_Type -Level		Geogr._Decl.	Geogr._Incl.	Moment (emu)	Error	Mag. Susc.		Polarity interpretation and rating
A	130.1	NRM	0	306.9	74.3	3.43e-07	1.5			NP
B	130.1	TT	150	327.1	80.9	3.15e-07	1.5			Gradually removing some shallow storage overprints followed by the Brunhes component (shaded in light blue) until reaching the end points (AF30-35) with mag dec 100.5 incl 76.7. NP is rated here due to noisy-looking
C	130.1	AF	3.6	322	81.5	3.14e-07	1.5
D	130.1	AF	8.1	329.1	83.6	2.95e-07	1.6
E	130.1	AF	12.2	310	88.3	2.87e-07	1.6
F	130.1	AF	3.6	177.9	84.6	2.92e-07	1.7
G	130.1	AF	8.1	221.3	84.2	2.84e-07	1.7
H	130.1	AF	12.2	154	84.1	2.85e-07	1.7
I	130.1	AF	14	147.6	83	2.71e-07	1.7
J	130.1	AF	16.1	124.3	85.6	2.76e-07	1.7
K	130.1	AF	20.9	117.8	86.6	2.46e-07	1.9
L	130.1	AF	28	82.3	77.9	1.8e-07	2.1
M	130.1	AF	30	122.3	72.5	1.52e-07	2.5
N	130.1	AF	35	131.6	69.4	1.21e-07	2.9
O	130.1	AF	40	103.4	62.9	1.33e-07	2.7
P	130.1	AF	45	68.9	77.5	8.74e-08	3.8
Q	130.1	AF	50	346.6	72.3	6.79e-08	4.2			not tied to origin
A	131.45	NRM	0	318.9	41.3	1.97e-07	1.3	25.6		N?
B	131.45	TT	100	317.5	43.1	1.61e-07	1.3			Similar to sample 132.35, a definite normal but noisy-looking, probably due to the AF not being stable.
C	131.45	TT	150	314.2	43.6	1.37e-07	1.4
D	131.45	TT	175	314.5	37.8	1.31e-07	1.4
E	131.45	AF	3.6	308.8	29.5	1.36e-07	1.4
F	131.45	AF	8.1	331.8	36.9	9.17e-08	2
G	131.45	AF	12.2	329.8	50.6	1.03e-07	1.8
H	131.45	AF	14	321.3	42.2	9.21e-08	1.7
I	131.45	AF	16.1	319.7	31	9.65e-08	1.8
J	131.45	AF	25	357.1	51.2	1.34e-07	1.8
K	131.45	AF	30	351.2	57.7	1.21e-07	1.8
L	131.45	AF	35	342.1	19.5	6.87e-08	2.5
M	131.45	AF	40	29	45.2	5.31e-08	2.8
N	131.45	AF	45	336	58.5	5.21e-08	2.8
O	131.45	AF	50	293.1	14.8	4.66e-08	2.6
A	132.35	NRM	0	286.1	49.4	7.9e-07	1	27.6		NP
B	132.35	TT	100	282.5	55	6.14e-07	1.1			A definite normal sample, but the ChRM with best steps TT200-275 seem to have some persistent shallow overprints.
C	132.35	TT	150	283.5	55.1	5.06e-07	1.2	27
D	132.35	TT	175	282	55.5	4.76e-07	1.2
E	132.35	TT	200	282.6	55.8	4.36e-07	1.2	27.5
F	132.35	TT	225	283.5	55.8	4e-07	0.9	28.4
G	132.35	TT	250	285.2	55	3.91e-07	1.1	30
H	132.35	TT	275	283.1	55.6	3.63e-07	1.1
I	132.35	TT	300	287.5	44.5	2.87e-07	0.9	39
J	132.35	TT	320	295	40.1	2.97e-07	0.9
K	132.35	TT	340	296.2	40.3	2.51e-07	1.1	48.2
L	132.35	TT	360	280.4	46	2.53e-07	0.9	52.3
A	133.45	NRM	0	254.9	69.2	5.4e-07	1.3	62.4		NP
B	133.45	TT	100	274.1	75.4	4.33e-07	1.4			Gradually removing the mixed storage and present-day fields, stay steep down, the TT250-300 is last steps are not trending toward origin, with mag susc surging, thus not reliable. Best endpoints might be AF12.2-16.1, but 5deg steeper than early Cret direction
C	133.45	TT	150	276.7	78.6	3.61e-07	1.6
D	133.45	TT	150	278	78.3	3.61e-07	1.6	61
E	133.45	AF	3.6	290.2	80.9	3.37e-07	1.7
F	133.45	AF	5.8	306	81.3	3.22e-07	1.7
G	133.45	AF	8.1	308.2	83.6	3.07e-07	1.8
H	133.45	AF	12.2	338.5	80.9	2.85e-07	1.9
I	133.45	AF	14	334.9	78.9	2.86e-07	1.9
J	133.45	AF	16.1	344.7	80.1	2.97e-07	1.9
K	133.45	TT	200	21.3	83.4	2.76e-07	1.9
L	133.45	TT	225	11.4	78.8	2.74e-07	1.9	62.8
M	133.45	TT	250	12.1	74.6	2.66e-07	1.9
N	133.45	TT	275	7.2	73	2.53e-07	1.8
O	133.45	TT	300	1.5	67.1	2.48e-07	1.8	76.9
P	133.45	TT	325	7.4	57.1	1.89e-07	2.2
Q	133.45	TT	350	336.7	-0.9	3.58e-07	3.1	158
A	134.3	NRM	0	316.9	75.7	1.47e-06	1	72.1		NP
B	134.3	TT	100	341.3	73.9	1.36e-06	1.1	78.4		Gradually taking some shallow/storage and steep/Brunhes components; TT275-325 might be the best endpoints, but the resultant ChRM are a bit steep compared to early Cret, probably due to a persistent Brunhes overprint.
C	134.3	TT	125	335.2	79.7	1.3e-06	1	81.7
D	134.3	TT	150	335.4	82.8	1.27e-06	1
E	134.3	TT	175	338.9	83.3	1.25e-06	1
F	134.3	TT	200	350.5	79	1.23e-06	1
G	134.3	TT	225	349.4	82.4	1.21e-06	1
H	134.3	TT	250	350.5	79.7	1.19e-06	1	75
I	134.3	TT	275	354.4	78.6	1.14e-06	1	77.6
J	134.3	TT	300	348.8	83.3	1.1e-06	1
K	134.3	TT	325	343.7	85.7	1.04e-06	0.8	80.9
L	134.3	TT	350	353.4	82.2	7.97e-07	0.8	90.9
M	134.3	TT	375	310.9	55.7	6.12e-07	1.7
N	134.3	TT	375	311.5	41.7	6.02e-07	1.7
O	134.3	TT	400	321	48.4	3.86e-07	5.5	185
P	134.3	TT	425	343.6	17.3	6.21e-07	2.3			not tied to origin
Q	134.3	TT	450	322.2	45.4	4.76e-07	1.9	225
A	134.35	NRM	0	317.6	69.8	1.46e-06	1.1	74.6		N
B	134.35	AF	1.8	320.3	71.8	1.42e-06	1.1			Firstly steepened while removing steep brunhes components, the thermal treatment and higher AF gradually demagnetized to retrive the primary magnetization. AF8.1-16.1-20.9 are the best ChRM direction
C	134.35	AF	3.6	325.3	74.6	1.32e-06	1.1
D	134.35	AF	8.1	330.2	79.3	1.14e-06	1.1
E	134.35	AF	12.2	341.2	81.9	1.05e-06	1
F	134.35	AF	16.1	344.8	82.4	9.84e-07	1
G	134.35	AF	26.9	350.5	83.3	8.26e-07	1
H	134.35	AF	36.7	334.8	82.7	6.84e-07	1
I	134.35	AF	46.3	320.7	82.3	5.91e-07	1
J	134.35	AF	55.3	283.8	86	5.84e-07	0.9
K	134.35	TT	100	296.6	85.5	5.73e-07	0.9
L	134.35	TT	125	315.9	84.4	5.7e-07	0.9	66.8
M	134.35	TT	150	297.7	84.9	5.67e-07	0.9
N	134.35	TT	175	312.6	84.6	5.71e-07	0.9
O	134.35	TT	200	305.8	84.7	5.72e-07	0.8	67.8
P	134.35	TT	225	274.7	87.2	5.72e-07	0.9
Q	134.35	TT	225	291.3	86.7	5.77e-07	0.9	68.9
R	134.35	TT	250	330.5	84.3	5.8e-07	0.8
S	134.35	TT	275	339.9	86.2	5.75e-07	0.8
T	134.35	TT	300	341.2	79.7	5.48e-07	1.3
U	134.35	TT	325	335.9	73.7	4.71e-07	1.2	91.8
V	134.35	TT	350	344.1	71.9	4.17e-07	1.3	95.3
W	134.35	TT	375	281.4	61.4	4.58e-07	0.9	128
X	134.35	AF	3.6	289.6	60.4	3.98e-07	1.7
Y	134.35	AF	8.1	283.8	70.2	3.79e-07	2.1
Z	134.35	AF	16.1	275.3	75.6	3.47e-07	2.3
a	134.35	AF	20.9	276.1	73.9	3.3e-07	2.4
b	134.35	AF	30	226.9	73.7	2.86e-07	2.5
c	134.35	TT	400	343.6	14.9	1.93e-07	7.4
A	136.3	NRM	0	317.1	57	2.97e-07	1	26.6		N
B	136.3	AF	3.6	340.6	63	2.82e-07	1.4			Higher AF steps became very noisy-looking and probably absoring some spurious magnetizition. The best endpoints are TT200-250.
C	136.3	AF	8.1	342.2	75.1	2.39e-07	1.4
D	136.3	AF	12.2	325.9	69.4	2.2e-07	1.5
E	136.3	AF	16.1	15.7	77	1.82e-07	1.6
F	136.3	AF	20.9	318.9	80.4	2.09e-07	1.5
G	136.3	TT	200	310.9	77.4	1.77e-07	1.4	28.7
H	136.3	TT	225	286.6	77.8	1.76e-07	1.4
I	136.3	TT	250	270	79.9	1.52e-07	1.5	31.8
J	136.3	AF	25	315.3	79.7	1.2e-07	2
K	136.3	AF	30	268.2	69.8	1.17e-07	1.7
L	136.3	AF	35	267.9	50.3	1.48e-07	1.2
M	136.3	AF	40	305.6	66.8	9.34e-08	1.8
N	136.3	AF	45	267.1	45.5	7.2e-08	2.2
O	136.3	AF	50	306.6	9.4	5.81e-08	3.1
P	136.3	AF	55	2.5	17	5.66e-08	3.2
Q	136.3	AF	60	223	71.4	2.97e-08	3.8
R	136.3	AF	65	196.3	-16.7	7.07e-08	2.4
S	136.3	AF	70	172.4	-28.8	1.07e-07	1.5
A	137.45	NRM	0	22.2	72.3	3.62e-07	0.8	28.3		N
B	137.45	TT	100	21.8	73.1	3.24e-07	0.9			A good N sample -- gradually removed mixed storage and present-day field while clustering until coming out and reaching the early Cret direction at AF35-55.
C	137.45	TT	150	29.1	74.4	2.97e-07	0.8
D	137.45	TT	175	26.9	71	2.79e-07	0.9
E	137.45	AF	3.6	30.3	72.5	2.76e-07	0.8
F	137.45	AF	8.1	29.8	72.5	2.66e-07	0.8
G	137.45	AF	12.2	36.4	73	2.59e-07	0.8
H	137.45	AF	14	37.7	73.2	2.49e-07	0.8
I	137.45	AF	16.1	35.8	72.7	2.44e-07	0.8
J	137.45	AF	25	37.8	72.2	1.98e-07	0.8
K	137.45	AF	30	37.7	73.7	1.82e-07	0.8
L	137.45	AF	35	52.1	76.5	1.45e-07	0.8
M	137.45	AF	40	54.6	74.2	1.36e-07	0.9
N	137.45	AF	45	52.7	71.7	1.21e-07	0.9
O	137.45	AF	50	50	68.8	9.87e-08	1.1
P	137.45	AF	55	51.9	71.6	6.36e-08	1.6
Q	137.45	AF	60	83.7	77	6.27e-08	1.6
R	137.45	AF	65	85.1	73.4	4.1e-08	2.7
S	137.45	AF	70	283.5	42.8	3.89e-08	3.9
A	138.55	NRM	0	43.3	82	2.72e-07	0.7	17.5		N
B	138.55	TT	100	344.2	82.6	2.42e-07	1.2	23.3		Thermal steps after TT250 recorded a surge in mag susc and considered not viable here. The best endpoints are TT200-225-250
C	138.55	TT	125	349.7	78.1	2.19e-07	0.9	25.5
D	138.55	TT	150	338.7	80.9	1.9e-07	0.9
E	138.55	TT	175	336.7	79.6	1.86e-07	0.8
F	138.55	TT	200	332.4	77.4	1.72e-07	0.8
G	138.55	TT	225	340.2	73.3	1.66e-07	0.8
H	138.55	TT	250	337.6	71.9	1.75e-07	1	25
I	138.55	TT	275	5.4	40.5	1.56e-07	1.9	50.2
J	138.55	TT	300	3.4	43	1.67e-07	1.7
K	138.55	TT	325	17.3	30.7	1.1e-07	3.2	55.9
L	138.55	TT	350	26.3	41.8	1.28e-07	3	57.5
M	138.55	TT	375	333.8	39.3	1.21e-07	4
N	138.55	TT	375	353.2	22.2	1.23e-07	3.6
O	138.55	TT	400	358.4	25.7	1.17e-07	6.5	76.2
P	138.55	TT	425	320.6	-19.7	2.57e-07	2.3
Q	138.55	TT	450	345.7	-1.9	1.91e-07	4	131
A	138.6	NRM	0	311.4	55.7	3e-07	1	27		N
B	138.6	AF	1.8	310	58.9	2.88e-07	1.1			gradually taking off the storage and present-day overprints during the first AF steps, the thermal steps seem not be demagneiizing it too much while clustering around the same direction until coming out. The best steps for ChRM are TT225-250-275, but a bit shallower compared to early Cret direction
C	138.6	AF	3.6	315.6	62.9	2.8e-07	1.1
D	138.6	AF	8.1	310.3	66.4	2.48e-07	1.1
E	138.6	AF	12.2	304.7	69.7	2.34e-07	1.1
F	138.6	AF	16.1	303.4	68	2.12e-07	1.1
G	138.6	AF	26.9	286.7	69.3	1.84e-07	1.1
H	138.6	AF	36.7	215.2	66.3	1.55e-07	1
I	138.6	AF	46.3	239.3	63.4	1.6e-07	1.1
J	138.6	AF	55.3	228.9	58.3	1.74e-07	1.1
K	138.6	TT	100	229.7	56.9	1.64e-07	1
L	138.6	TT	125	233.9	57.3	1.64e-07	1	25.2
M	138.6	TT	150	235.8	57	1.66e-07	1
N	138.6	TT	175	238.6	58	1.74e-07	1
O	138.6	TT	200	238.9	55.5	1.75e-07	1	26.2
P	138.6	TT	225	238.9	54.4	1.7e-07	1.1
Q	138.6	TT	225	232	53.3	1.71e-07	0.9
R	138.6	TT	250	248.4	46.1	1.34e-07	1.8	38.1
S	138.6	TT	275	249.9	55.2	1.38e-07	2.1
T	138.6	TT	300	284.8	37.6	1.19e-07	1.5
U	138.6	TT	325	311.6	46	1.99e-07	0.9	53.8
V	138.6	AF	3.6	282.8	50.3	1.78e-07	1.9
W	138.6	AF	8.1	269.1	61.2	1.53e-07	2.3
X	138.6	AF	12.2	273.4	79.6	1.22e-07	2.9
Y	138.6	AF	16.1	271.3	70.3	1.42e-07	2.6
Z	138.6	AF	20.9	238.2	85.1	1.29e-07	2.8
a	138.6	AF	26.9	72	81.6	1.04e-07	3.6
b	138.6	AF	31.8	23.1	85.4	1.08e-07	3.5
c	138.6	TT	350	351	42.8	9.39e-08	3.1	55.8
d	138.6	TT	375	265.7	25.2	6.16e-08	4.6	64.2
e	138.6	TT	400	5.8	-19	1.02e-07	6.2
A	139.5	NRM	0	291.3	52.2	3.27e-07	1	18.5		N
B	139.5	TT	150	295.8	54.9	2.52e-07	1.1			AF3.6-12.2 are duplicated steps and the second group was not considered. The first steps removed the present-day field and AF14-16, AF30 are the best steps for endpoints.
C	139.5	AF	3.6	297	51.6	2.24e-07	1.1
D	139.5	AF	8.1	292.1	45.5	2.33e-07	1.1
E	139.5	AF	12.2	300	47.1	1.86e-07	1.2
F	139.5	AF	3.6	307	51.5	1.85e-07	1.2
G	139.5	AF	8.1	303.7	54	1.88e-07	1.2
H	139.5	AF	12.2	304.8	51.8	1.8e-07	1.3
I	139.5	AF	14	300.6	57.5	1.73e-07	1.5
J	139.5	AF	16.1	296	55.4	1.57e-07	1.2
K	139.5	AF	20.9	286.2	44.6	1.54e-07	1.1
L	139.5	AF	28	329.7	41.3	1.27e-07	1.4
M	139.5	AF	30	294.5	47	1.09e-07	1.2
N	139.5	AF	35	284.6	45.3	1.35e-07	1.2
O	139.5	AF	40	320.3	63.5	1.3e-07	1.5
P	139.5	AF	45	268.3	15.9	6.33e-08	1.1
A	140.2	NRM	0	308.7	49.1	3.99e-07	1	26		N
B	140.2	AF	3.6	318.6	55.3	3.51e-07	1.3			Gradually removing overprint and present-day overprints, but the endponts are a bit shallower compared to the early Cret. TT225-250-AF25 are the best options.
C	140.2	AF	8.1	323.8	57	3.3e-07	1.4
D	140.2	AF	12.2	333.7	59.8	2.85e-07	1.4
E	140.2	AF	16.1	330.2	64.4	2.48e-07	1.4
F	140.2	AF	20.9	328.9	62.5	2.32e-07	1.5
G	140.2	TT	200	337.8	62.4	1.95e-07	1.5	28.2
H	140.2	TT	225	332.8	59	2.08e-07	1.5
I	140.2	TT	250	340.4	53.6	2.26e-07	1.4	35.4
J	140.2	AF	25	345.4	52.1	1.86e-07	1.5
K	140.2	AF	30	333.4	43.3	1.12e-07	1.8
L	140.2	AF	35	316	9.6	9.98e-08	2.3
M	140.2	AF	40	295	65.6	8.06e-08	1.4			not tied to origin
N	140.2	AF	45	3.7	55.9	1.15e-07	1.9
O	140.2	AF	47.5	347.6	27.9	1.59e-07	1.9
A	141.2	NRM	0	236.4	53.5	2.51e-07	1.1	21.3		N
B	141.2	TT	100	235	66.8	2.07e-07	1.2			good normal -- gradually going a bit steeper. TT225 seems to have alterated the specimen and thus following steps are not considered. AF14-16.1 and TT200 are the best endpoints.
C	141.2	TT	150	209.1	66.9	1.76e-07	1.2	22
D	141.2	AF	3.6	198.2	70.8	1.69e-07	1.1
E	141.2	AF	5.8	185	72.5	1.74e-07	1.1
F	141.2	AF	8.1	201.5	73.7	1.65e-07	1.1
G	141.2	AF	12.2	221.3	69	1.6e-07	1.2
H	141.2	AF	14	200.6	66.4	1.6e-07	1.2
I	141.2	AF	16.1	202.7	65.5	1.54e-07	1.2
J	141.2	TT	200	203.5	73	1.31e-07	1.4
K	141.2	TT	225	307.8	84.9	1.28e-07	1.5	22.3
L	141.2	TT	250	116.8	85.7	1.19e-07	1.4
M	141.2	TT	275	318.8	78.4	1.12e-07	1.2
N	141.2	TT	300	341.5	84.6	1.01e-07	1.5	30.5
O	141.2	TT	325	194.5	86	7.44e-08	1.5
P	141.2	TT	350	105.1	71.9	1e-07	1.7	34.7
A	142.15	NRM	0	231.1	72	3.69e-07	1.1	27.4		N
B	142.15	TT	100	233.5	71.6	3.27e-07	1.2			This is a good normal sample -- first clustering with positive steep incl while removing present-day and stoage overprints, Higher AF is noisy-looking. Steps AF30-45 might be the best endpoints.
C	142.15	TT	150	217.1	63.9	2.92e-07	1.1
D	142.15	TT	175	219.2	62.6	2.78e-07	1.2
E	142.15	AF	3.6	216.3	62.5	2.77e-07	1.3
F	142.15	AF	8.1	216.3	61.8	2.81e-07	1.3
G	142.15	AF	12.2	215.3	64.6	2.61e-07	1.3
H	142.15	AF	14	212.8	67.8	2.52e-07	1.4
I	142.15	AF	16.1	203.9	64.9	2.51e-07	1.4
J	142.15	AF	25	201.4	65.5	2.15e-07	1.4
K	142.15	AF	30	215.4	66.5	2.02e-07	1.4
L	142.15	AF	35	201.2	67.1	1.79e-07	1.4
M	142.15	AF	40	185.5	69.4	1.55e-07	1.4
N	142.15	AF	45	224.3	67.9	1.42e-07	1.7
O	142.15	AF	50	194.4	79.2	1.39e-07	1.7
P	142.15	AF	55	241.3	79.5	1.03e-07	1.9
Q	142.15	AF	60	152.5	76.3	9.33e-08	2.1
R	142.15	AF	65	157.8	75.7	1.36e-07	1.6
S	142.15	AF	70	103.8	76.1	7.79e-08	2.1
T	142.15	AF	75	274	80.3	7.09e-08	2.3			not tied to origin
A	143.25	NRM	0	280.8	57.8	4.71e-07	1	30.4		N
B	143.25	TT	100	257.6	67.4	4.03e-07	1	36		gradually taking off the mixed present-day and storage overprints. TT225-275 are the best options.
C	143.25	TT	125	253	68.9	3.64e-07	1	38.5
D	143.25	TT	150	251.7	69.7	3.58e-07	0.9
E	143.25	TT	175	252	70.9	3.39e-07	0.9
F	143.25	TT	200	252.7	70.3	3.28e-07	1
G	143.25	TT	225	257.1	71.2	2.99e-07	0.9
H	143.25	TT	250	269.1	77.4	2.79e-07	0.9	44.1
I	143.25	TT	275	260.4	76.7	2.46e-07	1.3	49.4
J	143.25	TT	300	339.2	71.4	2.07e-07	2.7
K	143.25	TT	325	23.3	56.9	2.01e-07	3.2	65.8
L	143.25	TT	350	51.2	58	1.76e-07	3.9	69.2
M	143.25	TT	375	334.1	60.5	7.79e-08	5.9
N	143.25	TT	375	10	46	8.32e-08	4.4
O	143.25	TT	400	15.3	70.8	1.35e-07	4.7	53.7
P	143.25	TT	425	315.8	48.5	9.81e-08	2.1
Q	143.25	TT	450	323.3	-6.3	1.03e-07	3.3	60
A	144.2	NRM	0	295.2	32.7	3.99e-07	0.7	30.4		N
B	144.2	TT	100	286.6	35.4	3.76e-07	0.8			Start shallow but moved to steeper incl . TT250-325 might be the best options
C	144.2	TT	150	282.7	35.7	3.14e-07	0.7	30
D	144.2	AF	3.6	282.6	35.9	3.04e-07	0.7
E	144.2	AF	5.8	283.9	35.6	2.89e-07	0.7
F	144.2	AF	8.1	280.4	34.5	2.87e-07	0.7
G	144.2	AF	12.2	278.5	32.7	2.83e-07	0.7
H	144.2	AF	14	277.7	31.1	2.75e-07	0.6
I	144.2	AF	16.1	277.8	30.1	2.67e-07	0.6
J	144.2	TT	200	282.6	35.8	2.24e-07	0.6
K	144.2	TT	225	278.6	43	1.79e-07	0.8	29.9
L	144.2	TT	250	298.1	57.5	1.65e-07	1.2
M	144.2	TT	275	312.3	50.4	1.81e-07	1.3
N	144.2	TT	300	316.8	65.2	1.76e-07	1.5	49.4
O	144.2	TT	325	329.4	62.7	1.51e-07	1.8
P	144.2	TT	350	327.9	55.1	1.88e-07	1.5	54.2
A	144.55	NRM	0	286.8	63.3	4.11e-07	0.9	12.1		N
B	144.55	TT	150	297.4	69.1	3.27e-07	1			A definite normal. AF3.6-12.2 are duplicated and not considered here. AF steps higher than AF16.1 are imparting again spurious field and not considered viable.
C	144.55	AF	3.6	310.8	75.9	2.71e-07	0.9
D	144.55	AF	8.1	327.9	70.1	2.4e-07	0.9
E	144.55	AF	12.2	322.8	70.8	2.4e-07	0.8
F	144.55	AF	3.6	317.1	72.2	2.39e-07	0.8
G	144.55	AF	8.1	305.6	76.5	2.2e-07	0.8
H	144.55	AF	12.2	313.4	69.5	2.36e-07	0.7
I	144.55	AF	14	320.2	76.3	2.17e-07	0.8
J	144.55	AF	16.1	169.6	86.4	2.18e-07	0.9
K	144.55	AF	20.9	219.9	75.8	2.08e-07	1
L	144.55	AF	28	1.3	75.9	1.49e-07	0.9
M	144.55	AF	30	322.1	70.9	1.81e-07	0.8
N	144.55	AF	35	153.8	69.5	1.9e-07	1.1
O	144.55	AF	40	174.9	64.9	1.71e-07	1.1
P	144.55	AF	45	130.3	77.9	1.45e-07	1
Q	144.55	AF	50	197.2	68	1e-07	0.9
R	144.55	AF	55	343.8	78.1	7.52e-08	0.9
A	145.2	NRM	0	210.4	33.8	2.96e-07	1.6	14.1		NP
B	145.2	TT	100	222.5	49.1	2.39e-07	1.5			No trend toward reversed but no ideal endpts were reached. AF4-8, 14 might be the best.
C	145.2	TT	150	218.3	41.6	1.38e-07	1.7
D	145.2	TT	175	235.5	53.6	1.22e-07	1.7
E	145.2	AF	3.6	234.1	39.2	9.12e-08	1.2
F	145.2	AF	8.1	219.4	33.8	1.03e-07	1.2
G	145.2	AF	12.2	209.2	51.6	1.12e-07	1.2
H	145.2	AF	14	211.6	37.4	8.68e-08	1.1
I	145.2	AF	16.1	215.7	11.5	1.1e-07	1.3
J	145.2	AF	25	264.3	17.1	9.41e-08	1.1
K	145.2	AF	30	266.9	12.9	2.96e-07	0.6
L	145.2	AF	35	270	1.3	4.88e-07	0.6
M	145.2	AF	40	258	38.1	1.15e-07	1.1
A	146.35	NRM	0	353	19.7	2.62e-07	1.2	11.8		N
B	146.35	TT	100	3.6	31.5	1.71e-07	1.4			Start from shallow positive incl and gradually steepening. AF8.1 to AF16.1 might be the best endpts
C	146.35	TT	150	10.6	52.1	1.72e-07	1.3
D	146.35	TT	175	21.8	48.4	1.66e-07	1.3
E	146.35	AF	3.6	25.9	47.8	1.58e-07	1.6
F	146.35	AF	8.1	44.7	59.5	1.74e-07	1.5
G	146.35	AF	12.2	6.9	73	1.24e-07	1.7
H	146.35	AF	14	40.7	73.3	1.22e-07	1.8
I	146.35	AF	16.1	48	63.5	1.12e-07	1.8
J	146.35	AF	25	100.7	60.2	9.32e-08	1.6
K	146.35	AF	30	65.3	10	5.2e-08	2.5
L	146.35	AF	35	262.4	35.3	2.18e-07	1.1
M	146.35	AF	40	251.2	54.4	1.62e-07	1.3
N	146.35	AF	45	247.4	8.6	2.89e-07	1.1
A	147.6	NRM	0	230.1	64.3	2.58e-07	0.8	60.7		N
B	147.6	AF	3.6	220.6	69.3	2.36e-07	1.6			Stayed pointing down and gradually steepened a bit. The best endpoints might be TT250 to AF25-40
C	147.6	AF	8.1	209.2	70.6	2.22e-07	1.7
D	147.6	AF	12.2	200.3	70	2.04e-07	1.8
E	147.6	AF	16.1	192.4	67.1	1.81e-07	1.9
F	147.6	AF	20.9	193.9	67.3	1.64e-07	2
G	147.6	TT	200	189.5	64.2	1.44e-07	2.2	63
H	147.6	TT	225	192.1	65.4	1.45e-07	2.4
I	147.6	TT	250	212.5	73.5	1.33e-07	2.7	70.4
J	147.6	AF	25	192.8	66.8	1.16e-07	3
K	147.6	AF	30	205	68.1	9.91e-08	3.5
L	147.6	AF	35	226	73.2	9.5e-08	3.6
M	147.6	AF	40	205	74.2	8.11e-08	4.1
N	147.6	AF	45	237.9	75.8	7.7e-08	4.1
O	147.6	AF	47.5	192.2	78.1	7.61e-08	4.4
P	147.6	AF	50	205.7	73.7	6.73e-08	5.1
Q	147.6	AF	55	188.5	57.1	5.52e-08	5.9
R	147.6	AF	60	220.9	55	4.12e-08	8.4
S	147.6	AF	65	241.9	69.7	5.5e-08	5.9
A	148.8	NRM	0	197.9	41	3.81e-08	1.5	23.1		R
B	148.8	TT	100	227.4	34.1	3.02e-08	1.8			Start with positive incl and flipped over at TT150 and moved across the origin at higher temp. the intensity and mag susc both went up and questionable. Probably AF8.1-12.2 are the best options
C	148.8	TT	150	211.5	-18.5	4.02e-08	2.4	24
D	148.8	AF	3.6	215.2	-19.3	4.48e-08	1.6
E	148.8	AF	5.8	225.3	-15.8	5.13e-08	1.3
F	148.8	AF	8.1	201.9	-42.6	4.3e-08	1.5
G	148.8	AF	12.2	161.1	-52.5	4.84e-08	1.1
H	148.8	AF	14	76.3	-84.7	5.14e-08	1.4
I	148.8	AF	16.1	178	-87.1	6.19e-08	1.2
J	148.8	TT	200	336.3	-55.4	1.24e-07	2
K	148.8	TT	225	337.4	-48.4	2.23e-07	1.8	44.9
L	148.8	TT	250	338.8	-44.2	2.08e-07	2
M	148.8	TT	275	321.9	-48.6	1.87e-07	1.9
N	148.8	TT	300	345.9	-43.8	2.41e-07	2	50.4
O	148.8	TT	325	353	-55.3	1.61e-07	2.3
P	148.8	TT	350	357.6	-45.2	2.11e-07	1.9	53.8
A	149.9	NRM	0	242.5	-27.8	2.24e-07	1.1	14.1		INT
B	149.9	TT	100	242.6	-36.3	1.52e-07	1.2			Sample is upside down -- gradually shallowing until near horizontal but never flipped over but instead "coming back" to be around the same direction as initial overprints. INT is thus assigned
C	149.9	TT	150	253.4	-13.6	9.27e-08	0.8
D	149.9	TT	175	262.1	-17.2	8.21e-08	1
E	149.9	AF	3.6	269.6	0	8.26e-08	0.3
F	149.9	AF	8.1	268.2	-3.3	8.61e-08	0.5
G	149.9	AF	12.2	242	-6.6	9.82e-08	0.8
H	149.9	AF	14	215.4	-5.2	1.13e-07	1.2
I	149.9	AF	16.1	246.1	-22.4	6.09e-08	1.2
J	149.9	AF	25	175.4	-48.7	8.47e-08	1.6
K	149.9	AF	30	271.4	-9.4	6.29e-08	1
L	149.9	AF	35	291.6	19.8	1.98e-07	0.7
M	149.9	AF	40	147.8	-60	1.23e-07	1.3
A	150.8	NRM	0	230.3	-29.8	1.24e-07	19.3	341		N
B	150.8	AF	3.6	226.1	-40.8	1.11e-07	14.6			Sample is upside down -- gradually steepening and AF20.9 to TT200 and TT250 might be the best endpoints
C	150.8	AF	8.1	222.3	-36.9	9.99e-08	16.1
D	150.8	AF	12.2	197.2	-36.4	1.27e-07	10.8
E	150.8	AF	16.1	225.7	-51.1	8.52e-08	19.2
F	150.8	AF	20.9	300.4	-53.8	8.23e-08	21.8
G	150.8	TT	200	302.1	-54.2	7.46e-08	23.2	345
H	150.8	TT	225	314.2	-53.9	9.28e-08	20.7
I	150.8	TT	250	298.3	-56.6	9.3e-08	20.5	348
J	150.8	AF	25	181.7	-73.1	6.9e-08	29.6
K	150.8	AF	30	227.1	-70.6	7.22e-08	27.7
L	150.8	AF	35	289.8	-42.1	5.79e-08	33
M	150.8	AF	40	208.3	60.9	1.69e-08	2.4
N	150.8	AF	45	288	10.6	7.24e-08	27.7
A	152	NRM	0	243.5	77.2	6e-07	1.1	29.5		N
B	152	TT	100	234.4	78	5.3e-07	1			clustering pointing down while int decreasing. AF14-16.1-TT200 might be the best endpoints
C	152	TT	150	220.9	77.1	4.58e-07	1	30
D	152	AF	3.6	220.7	76.8	4.52e-07	1
E	152	AF	5.8	221.4	75.6	4.44e-07	1
F	152	AF	8.1	222.4	75.2	4.38e-07	1
G	152	AF	12.2	224.4	74.4	4.02e-07	1
H	152	AF	14	222.9	73.3	3.82e-07	1.1
I	152	AF	16.1	225.5	72.5	3.67e-07	1
J	152	TT	200	226.3	76.2	3.39e-07	1
K	152	TT	225	335.3	73.3	3.86e-07	1.5	56.5
L	152	TT	250	351	66.3	3.81e-07	1.7
M	152	TT	275	3.1	74.7	3.81e-07	1.8
N	152	TT	300	9.3	48	4.63e-07	1.8	110
O	152	TT	325	4.3	48.9	4.35e-07	2.2
P	152	TT	350	7.3	43.2	6.26e-07	2	213
A	152.8	NRM	0	161.3	-52.4	4.62e-08	1.7	7.4		NPP
B	152.8	TT	150	108.2	-63.7	5.02e-08	1.5			Pair sample of 152.85; Sample is upside down. AF3.6-12.2 steps were duplicated and not considered here. Best steps might be AF20.9-28, AF40
C	152.8	AF	3.6	132.5	-46.2	5.19e-08	1.5
D	152.8	AF	8.1	136.7	-52.1	6.36e-08	1.3
E	152.8	AF	12.2	94.7	-46.4	4.5e-08	1.4
F	152.8	AF	3.6	94.7	-44.6	4.13e-08	0.6
G	152.8	AF	8.1	116.6	-39.6	4.09e-08	1.3
H	152.8	AF	12.2	133.8	-28.1	3.8e-08	1.4
I	152.8	AF	14	80.6	-56	3.08e-08	1.4
J	152.8	AF	16.1	121.3	-48.1	4.33e-08	1.1
K	152.8	AF	20.9	127.8	-54	5.08e-08	1.3
L	152.8	AF	28	109.1	-39.7	6.23e-08	1.3
M	152.8	AF	30	121	-2.3	4.58e-08	1.7
N	152.8	AF	35	133.1	-38.8	1.01e-07	1.3
O	152.8	AF	40	120.9	-64.3	3.62e-08	1.2
A	152.85	NRM	0	286.5	75.6	2.72e-07	1.3	3.1		N
B	152.85	TT	100	316.6	79.2	2.33e-07	1.3	8.7		Stayed pointing down. Best steps are TT300-325.
C	152.85	TT	125	300.3	83.4	2.14e-07	1.4	10.7
D	152.85	TT	150	309	82.8	2.05e-07	1.4
E	152.85	TT	175	264.7	86.4	2.04e-07	1.3
F	152.85	TT	200	236.5	86.6	1.97e-07	1.4
G	152.85	TT	225	168.5	80.4	2.21e-07	1.4	7.1
H	152.85	TT	250	163.7	81.1	2.47e-07	1.4	7.3
I	152.85	TT	275	336.6	83.7	2.06e-07	1.4
J	152.85	TT	300	274.6	77.2	1.88e-07	1.3	7.8
K	152.85	TT	325	278.7	81.3	1.58e-07	1.4
L	152.85	TT	350	226.6	58.1	1.25e-07	1.4	7.7
M	152.85	TT	375	341.7	63	5.18e-08	3.1	15.5
N	152.85	TT	375	355.8	63.2	5.6e-08	2.8
O	152.85	TT	400	105.6	60	7.11e-08	2.9	44
P	152.85	TT	425	308.2	54.4	8.88e-08	1.5			not tied to origin
Q	152.85	TT	450	341.6	34.2	1.03e-07	2.1
A	153.25	NRM	0	77.2	42.3	1.03e-07	0.8	4.7		INT
B	153.25	TT	100	88	30.8	9.91e-08	0.9			Not demagnetizing with intensity not decreasing; incl however keeps shallowing, although noisy-looking. Probabably a transitiional polarity. INT is rated here.
C	153.25	TT	150	94.1	21.7	9.63e-08	0.6	4.1
D	153.25	TT	175	94	24.2	9.68e-08	0.7
E	153.25	TT	200	94.2	29.5	9.35e-08	1	4
F	153.25	TT	225	96	33.8	1.01e-07	1	4.1
G	153.25	AF	3.6	101.8	26.2	1.01e-07	0.7
H	153.25	AF	8.1	100.3	34.5	1.16e-07	0.9
I	153.25	AF	12.2	98.9	40.7	1.23e-07	0.9
J	153.25	TT	250	97.1	45.8	1.05e-07	1	4.2
K	153.25	TT	275	108.3	36.7	1.25e-07	1
L	153.25	TT	300	112.6	35.3	1.54e-07	0.9	4.4
M	153.25	TT	320	104.3	20.1	1.82e-07	0.6
N	153.25	TT	340	96.1	19.3	1.58e-07	0.8	4.5
O	153.25	TT	360	97.6	11.6	1.16e-07	0.7	3.9
A	154.9	NRM	0	215.6	-14.1	1.93e-07	1.6	-2.6		RPP
B	154.9	TT	100	208.6	-19.4	1.48e-07	1.7	3.2		Start negative and int increased after TT175. The best endpoint might be TT175.
C	154.9	TT	125	205.4	-16.7	1.37e-07	1.6	5
D	154.9	TT	150	210.6	-18.1	1.1e-07	1.7
E	154.9	TT	175	215.3	-60.9	8.39e-08	2
F	154.9	TT	200	28.1	-66.5	1.5e-07	1.9
G	154.9	TT	225	35.6	-47.9	2.44e-07	1.7
H	154.9	TT	250	22.7	-20.5	2.75e-07	1.5	0.5
I	154.9	TT	275	33.1	-38.3	3.4e-07	1.6	0.9
J	154.9	AF	0	33.3	-45.8	3.42e-07	1.6
K	154.9	AF	3.6	343.3	-47.4	3.33e-07	1.5
L	154.9	AF	8.1	350.6	-43.5	3.2e-07	1.4
M	154.9	AF	12.2	312.6	-36.1	3.85e-07	1.1
N	154.9	AF	16.1	315.6	-34.3	2.2e-07	1.1
O	154.9	AF	26.9	16.9	38.4	1.32e-07	2
P	154.9	AF	36.7	260.5	-22.6	2.99e-07	1.5
Q	154.9	AF	46.3	291.8	-32.4	2.68e-07	0.8
R	154.9	AF	55.3	299.1	-25	1.84e-07	1
S	154.9	AF	64.1	52.1	54.2	1.81e-07	1.6
A	155.7	NRM	0	243.6	-4.8	8.09e-07	1.4	22.3		RP
B	155.7	TT	100	246.5	-8.5	7.51e-07	1.3			Start with negative but shallow incl and gradually steepened; mag susc went up from TT200. Best endpoints might be TT225-275, but too shallow compared to early Cret direction
C	155.7	TT	150	249	-12.7	6.68e-07	1.2	24
D	155.7	TT	175	253.6	-15.3	6.24e-07	1.2
E	155.7	TT	200	255.1	-20.1	6e-07	1.2	35
F	155.7	TT	225	256.2	-27.4	5.24e-07	1.1	38.2
G	155.7	TT	250	258.8	-26.6	4.59e-07	1.2	44.2
H	155.7	TT	275	259.6	-27	4.44e-07	1.2
I	155.7	TT	300	261.6	-34.5	4.03e-07	1.1	47.1
J	155.7	TT	320	259.9	-43.4	3.05e-07	1.2
K	155.7	TT	340	258.5	-26.6	6.09e-07	1.1	64.9
L	155.7	TT	360	288.7	-28.9	3.25e-07	1.4	90.7
A	156	NRM	0	272.2	50.9	1.38e-07	1	2.2		NP
B	156	TT	100	282.8	51.8	1.14e-07	0.8			Stayed pointing down and no trend to getting reversed. Best endpoints might be TT275-300 tied to origin
C	156	TT	150	278.6	49.9	1.1e-07	0.9
D	156	TT	175	268.7	52.5	1.02e-07	0.9
E	156	TT	200	273	52	9.64e-08	0.8	2.3
F	156	TT	225	281.9	58.5	7.47e-08	0.7	2.2
G	156	TT	250	304.4	64.3	1.06e-07	0.7	2.1
H	156	TT	275	266.1	67.6	1.12e-07	0.9
I	156	TT	300	257.2	59.7	7.95e-08	0.9	2.1
J	156	TT	325	119.2	40.7	3.95e-08	1.2
K	156	TT	350	184.3	42.3	2.28e-08	1	2.7
A	156.4	NRM	0	234.9	74.2	1.83e-07	0.8	7.3		NP
B	156.4	AF	3.6	265.7	76.7	1.67e-07	1			Shallowed slightly from ca. 75 deg incl to be ca. 53 deg with the best endpoints at TT200-250
C	156.4	AF	8.1	271.7	75.8	1.43e-07	1.1
D	156.4	AF	12.2	277.4	71.6	1.22e-07	1.1
E	156.4	AF	16.1	266.2	59.5	9.87e-08	1.1
F	156.4	AF	20.9	263	58.3	7.89e-08	1.1
G	156.4	TT	200	274.5	49.3	4.83e-08	0.9	7.4
H	156.4	TT	225	278.7	50.5	4.45e-08	1.2
I	156.4	TT	250	271.4	55.5	4.24e-08	1.1	8.8
J	156.4	AF	25	322.7	36.8	2.26e-08	1.7
K	156.4	AF	30	257.3	75.3	1.81e-08	1.7
L	156.4	AF	35	336.8	-41.4	1.42e-07	0.7
M	156.4	AF	40	257.8	4.4	2.08e-08	64.8
N	156.4	AF	45	298	16.1	2.44e-08	1.5
A	157.2	NRM	0	262.7	16.3	1.78e-07	0.8	12.8		RPP
B	157.2	TT	150	262.4	18.3	1.31e-07	0.6			Start with positive and shallow incl until flipped over at AF28 . A good trend toward R but not reaching the early Cret direction. The best endpoints are AF35-40-50 (AF45 is questionable). Upgraded from R? to RPP
C	157.2	AF	3.6	261.7	15.8	1.23e-07	0.8
D	157.2	AF	8.1	255	17.4	1.13e-07	0.9
E	157.2	AF	12.2	253.9	9.6	9.21e-08	0.7
F	157.2	AF	3.6	253.8	10	9.03e-08	0.7
G	157.2	AF	8.1	253.9	14	8.78e-08	0.8
H	157.2	AF	12.2	251.7	14.2	8.7e-08	0.8
I	157.2	AF	14	250.1	9.1	8.77e-08	0.7
J	157.2	AF	16.1	251	6.7	8.21e-08	0.7
K	157.2	AF	20.9	255	2.1	6.73e-08	0.5
L	157.2	AF	28	244.5	-18.3	5.7e-08	1
M	157.2	AF	30	238.9	-13.5	5.03e-08	1.1
N	157.2	AF	35	220.7	-26.2	6.05e-08	1.2
O	157.2	AF	40	227.4	-24.3	5.77e-08	1.3
P	157.2	AF	45	252.7	-33	4.59e-08	1.1
Q	157.2	AF	50	205.2	-29.6	6.11e-08	1.2
A	157.4	NRM	0	279	37.2	2.78e-07	1	11.8		INT
B	157.4	TT	100	281.8	38.2	2.31e-07	1.2			clustering at ca. 38deg incl while intensity gradually decreasing, until TT300, when mag susc surged. No obvious trend toward N or R.
C	157.4	TT	150	280.1	34.2	1.95e-07	1	12
D	157.4	AF	3.6	278.8	37.1	1.87e-07	1.1
E	157.4	AF	5.8	278.4	36.2	1.86e-07	1
F	157.4	AF	8.1	275.7	35.4	1.76e-07	1.1
G	157.4	AF	12.2	273.2	35.5	1.59e-07	1
H	157.4	AF	14	279.4	41.2	1.5e-07	1.1
I	157.4	AF	16.1	274.3	39.4	1.56e-07	1.1
J	157.4	TT	200	272.2	39.3	1.47e-07	1.2
K	157.4	TT	225	273.8	38.4	1.4e-07	1.1	12.7
L	157.4	TT	250	271.1	36.3	1.35e-07	1
M	157.4	TT	275	276.3	35.3	1.25e-07	1
N	157.4	TT	300	305.7	38.9	1.21e-07	1.2	22.7
O	157.4	TT	325	338.6	46.7	6.78e-08	2
P	157.4	TT	350	345.5	36.1	7.14e-08	2.5	43.4
A	157.9	NRM	0	11.8	47.1	2.38e-07	1.2	7		INT
B	157.9	TT	100	17.9	50.9	1.94e-07	1.3			Linear fit, if not tied to the origin, then a normal component coming off from 200-275C at dec 298 and incl 15 deg; the trend is moving gradually counterclockwise. INT is assigned here since it is not moving toward the origin and no end-member is ever reached.
C	157.9	TT	150	10.7	39.1	1.55e-07	1.5	8.1
D	157.9	TT	175	10.1	40	1.49e-07	1.5
E	157.9	TT	200	3.2	33.2	1.53e-07	1.5	8.6
F	157.9	TT	225	359.3	33.3	1.35e-07	1.5	8.5
G	157.9	TT	250	347.3	32.4	1.17e-07	1.6	9.2
H	157.9	TT	275	338	37.8	1.11e-07	1.4
I	157.9	TT	300	340.5	15.4	8.9e-08	1.6	11
J	157.9	TT	320	18.8	32.5	6.17e-08	1.7
K	157.9	TT	340	102.1	48.4	4.62e-10	77.6
L	157.9	TT	340	340.5	34.2	7.02e-08	1.4	10.9
M	157.9	TT	360	21.1	14.1	4.7e-08	2	13.5
A	158.1	NRM	0	94.7	-58	5.19e-08	1.8	4.1		R
B	158.1	AF	3.6	103.3	-41.7	6.92e-08	1.5			Sample is upside down and weak -- gradually shallowing and then flipped over at AF12.2 but noisy-looking probably due to odd AF behaviors. Best endpoints are AF36.7-55.3
C	158.1	AF	8.1	111.5	-18.3	4.77e-08	1.7
D	158.1	AF	12.2	98.7	10.3	6.75e-08	1.2
E	158.1	AF	16.1	58.3	11.2	8.05e-08	1.7
F	158.1	AF	26.9	135.7	18.4	7.34e-08	1
G	158.1	AF	36.7	135.8	49.4	1.04e-07	0.8
H	158.1	AF	46.3	179.8	65.5	9.83e-08	1
I	158.1	AF	55.3	152.4	52.2	9.04e-08	0.8
J	158.1	AF	64.1	164.5	42.9	9.42e-08	0.8
K	158.1	AF	73.6	156.2	47.3	1.35e-07	0.8
L	158.1	AF	82.8	193.8	22.9	7.14e-08	1
M	158.1	AF	92.2	216.7	25.4	1.07e-07	1.1
N	158.1	AF	102.1	165.7	17.1	1.31e-07	1.1
O	158.1	AF	117.5	202.7	10.7	4.94e-08	1.2
A	158.15	NRM	0	11.7	-11.5	4.72e-08	1.4	5.4		R
B	158.15	TT	100	33.8	1	5.04e-08	1.5			Sample is upside down. Start from positive and flipped over upon TT treatment. Intensity went up at TT225 and noisy-looking. The best endpoints might be TT325 to AF3.6-8.1
C	158.15	TT	125	29	13.1	4.79e-08	1.7	4
D	158.15	TT	150	25.7	22.2	4.86e-08	1.7
E	158.15	TT	175	25.9	37.3	4.62e-08	1.5
F	158.15	TT	200	20.2	39	4.8e-08	1.6	5
G	158.15	TT	225	330	33.9	7.8e-08	1.2
H	158.15	TT	225	350.3	43.4	5.92e-08	1.5
I	158.15	TT	250	328.6	43.3	8.03e-08	1.1	5.4
J	158.15	TT	275	316	49.7	7.86e-08	0.9
K	158.15	TT	300	220.9	51.9	7.22e-08	1.6
L	158.15	TT	325	283.8	47.4	8.2e-08	1.5	5.5
M	158.15	AF	3.6	295.1	54.9	7.44e-08	1.6
N	158.15	AF	8.1	310.2	51.1	7.38e-08	1.6
O	158.15	AF	12.2	320.7	9.5	5.51e-08	1.5
P	158.15	AF	16.1	359	58.9	4.45e-08	2.3
Q	158.15	AF	20.9	192.6	-60.7	2.06e-08	2.1			not tied to origin
R	158.15	AF	26.9	206.9	-73.4	4.24e-08	0.7
S	158.15	AF	31.8	188.6	-11.9	4.96e-08	1.3
T	158.15	TT	350	196.8	15	1.71e-08	1.9	5.5
U	158.15	TT	375	349.1	-37.5	5.3e-08	1.4	5.4
A	158.7	NRM	0	95.8	6.2	5.53e-08	2.4	3.6		RPP
B	158.7	TT	100	95.9	-4.7	6.68e-08	1.5			Start with positive but near-horizontal incl and flipped over immdiately upon heating. Higher AF stps again might have imparted spurious components and not considered viable here. Upgraded from R? to RPP. AF 3.6 might be the best endpoint.
C	158.7	TT	150	92.6	-18.8	7.79e-08	1.2	3.5
D	158.7	AF	3.6	120.7	-32.5	4.23e-08	1.9
E	158.7	AF	8.1	123.3	-19.2	4.84e-08	1.9
F	158.7	AF	12.2	111.8	-15.8	5.01e-08	1.7
G	158.7	AF	16.1	167.7	22	4.74e-08	1.2
H	158.7	TT	175	163.9	15.8	4.57e-08	1.3
I	158.7	TT	200	188.6	55.9	4.73e-08	1	3.8
J	158.7	TT	225	170.4	61.3	4.31e-08	0.9	3.8
K	158.7	TT	250	121.9	41.5	5.39e-08	0.8	3.4
L	158.7	TT	275	127.5	24.1	6.4e-08	0.8
M	158.7	TT	300	145.8	35.3	7.57e-08	0.9	4
N	158.7	TT	320	144.7	31.9	5.64e-08	0.9			not tied to origin
O	158.7	TT	340	134.8	33.7	7.33e-08	1.1	3.5
P	158.7	TT	360	125.9	57.8	7.93e-08	1.4	4.6
A	159.1	NRM	0	168.9	39.2	1.28e-07	1.3	1.1		INT
B	159.1	AF	1.8	158.9	29.9	1.25e-07	1.3			The intensity increases at AF12.2 mT, which has to be an opposite direction to the direction coming off from the first four steps (that is normal), or this int. increase is a component imparted by the AF treatment. Therefore an INT is assigned.
C	159.1	AF	3.6	164.9	33.9	9.38e-08	1.5
D	159.1	AF	8.1	150.8	34	8.8e-08	1.4
E	159.1	AF	12.2	131	44.3	1.17e-07	1.1
F	159.1	AF	16.1	143.6	30.6	1.16e-07	1.3
G	159.1	AF	26.9	157.7	56.7	1.1e-07	1.3
H	159.1	AF	36.7	129.8	79.6	4.8e-08	1.6
I	159.1	AF	46.3	290.6	-36.6	1.94e-08	1.5
J	159.1	AF	55.3	212.2	-0.7	3.1e-08	1.4
A	159.15	NRM	0	236.5	69.7	1.31e-07	1.3	-2.2		R?
B	159.15	TT	100	226.5	64.9	1.12e-07	1.7	3.2		The coming-off direction of 200-275 ºC (225 is a spurious measurement and not used) is dec 50/inc -44 resulting in increased int., leaving behind a N? component with the mean directions of the dominant initial overprint of dec 253/incl 63. then the AF seems to be taking off a similar overprint to the initial component (Brunhes component?)
C	159.15	TT	125	223.3	64.6	1.02e-07	1.2	5.4
D	159.15	TT	150	222.3	58.2	9.63e-08	1.7
E	159.15	TT	175	233.3	47.8	1.07e-07	1.8
F	159.15	TT	200	242.4	41.5	1.13e-07	1.7
G	159.15	TT	225	267.5	53.8	1.11e-07	1.6	1.4
H	159.15	TT	250	233.1	37	1.4e-07	1.5
I	159.15	TT	275	230.4	44.1	1.66e-07	1.3	1.6
J	159.15	AF	0	230.4	46.2	1.65e-07	1.3
K	159.15	AF	3.6	223.5	42.8	1.39e-07	1.3
L	159.15	AF	8.1	219.5	38.8	1.31e-07	1.3
M	159.15	AF	12.2	206.3	39.4	1.24e-07	1.2
N	159.15	AF	16.1	204.3	27.6	1.89e-07	1.4
O	159.15	AF	26.9	190.9	57.8	4.79e-08	1
P	159.15	AF	36.7	233	31.4	1.05e-07	1.1
Q	159.15	AF	46.3	216.7	20.1	1.6e-07	1.2
R	159.15	AF	55.3	208.4	-4.5	1.73e-07	1.5			not tied to origin
S	159.15	AF	64.1	344.4	-31.4	9.04e-08	1.2
A	159.8	NRM	0	346.3	-27.7	1.71e-07	1.2	1.3		RP
B	159.8	TT	100	350.7	-21.8	1.74e-07	1.3			Start being negative and gradually steepened to be close to
C	159.8	TT	150	356.1	-15.5	1.71e-07	1.4
D	159.8	TT	175	357.3	-32	1.75e-07	1.2
E	159.8	TT	200	0	-36.6	1.57e-07	1.2	0.9
F	159.8	TT	225	346.9	-73.9	1.4e-07	1	0.9
G	159.8	AF	3.6	57.7	-63.7	1.63e-07	1.2
H	159.8	AF	8.1	351.1	-67.9	1.28e-07	1.1
I	159.8	AF	12.2	56.4	-51.7	1.76e-07	1.3
J	159.8	TT	300	99.5	-75.2	6.08e-08	2	1
K	159.8	TT	325	336.6	-15	3.4e-08	1.9
A	160	NRM	0	102.5	69.4	1.65e-07	0.8	-3		NPP
B	160	TT	100	102.3	64.2	1.61e-07	0.9	2.5		Steps after TT350 get noisy and not considered viable here. Slightly shallowed from 70 to 41 deg incl with thermal treatments.
C	160	TT	125	115.2	61.3	1.69e-07	0.8	4.8
D	160	TT	150	116.1	57.7	1.7e-07	0.7
E	160	TT	175	121.9	55.4	1.73e-07	0.8
F	160	TT	200	122.8	49.6	1.83e-07	0.7
G	160	TT	225	126.3	45.2	1.89e-07	0.8
H	160	TT	250	127.6	41	1.71e-07	0.8	0.5
I	160	TT	275	146.8	41.8	1.37e-07	0.9	0.5
J	160	TT	300	77.5	68.8	9.81e-08	0.8
K	160	TT	325	86.7	64.1	1.12e-07	1	0.7
L	160	TT	350	41.5	50.2	8.54e-08	1.2	0.6
M	160	TT	375	79.5	22.9	6.36e-08	0.7
N	160	TT	375	77.7	24.1	6.31e-08	0.7	1.5
O	160	TT	400	45.9	42	1.13e-07	1	2.5
P	160	AF	0.7	52.8	46.3	1.12e-07	1
Q	160	AF	1.1	53.1	47	1.09e-07	0.9
R	160	AF	1.4	31.8	44.5	1.18e-07	1.1
S	160	AF	1.8	35	44.8	1.15e-07	1.2
T	160	AF	2.1	39.7	43.9	1.2e-07	1.2
U	160	AF	2.5	44	40.1	1.19e-07	1.2
V	160	TT	425	85.7	62.2	8.37e-08	1
W	160	TT	450	79.5	29.1	3.56e-08	1.5
A	160.05	NRM	0	316	26.1	7.78e-08	1.2	0.6		N?
B	160.05	AF	1.8	321.4	20.7	8.82e-08	1.2			Mostly noise. INT upgraded to N? due to the normal context and positive.
C	160.05	AF	3.6	293.7	39.3	1.31e-07	1.1
D	160.05	AF	8.1	349.7	-6.3	4.82e-08	1.3
E	160.05	AF	12.2	133.2	23.1	3.75e-08	1
F	160.05	AF	16.1	160	25.5	7.58e-08	1.1
G	160.05	AF	26.9	315.1	-23.1	8.49e-08	1
H	160.05	AF	36.7	319	-25.7	1.44e-07	0.8
I	160.05	AF	46.3	284.4	51.7	7.22e-08	1.3
J	160.05	AF	55.3	171	22.5	1.05e-07	1.5
A	161.1	NRM	0	214.7	57.9	1.04e-07	1.8	0.9		N?
B	161.1	TT	100	141.3	73.9	1.29e-07	1.5			Intensity keeps increasing as thermal continues until TT300 and then going crazy. The coming off direction of TT250-300 is 30decl and 29incl, thus the primary magnetization must be posiive. N? is rated here.
C	161.1	TT	150	85.7	77.1	1.32e-07	1.6
D	161.1	TT	175	66.4	79.7	1.8e-07	1.3
E	161.1	TT	200	68.6	70.8	1.67e-07	1.4	0.6
F	161.1	TT	225	66.5	65.9	1.59e-07	1.4	0.8
G	161.1	TT	250	37.8	38.9	1.58e-07	1.3	1.2
H	161.1	TT	275	44.9	29.5	1.44e-07	1.6
I	161.1	TT	300	57.9	42.3	6.62e-08	1.6	1
J	161.1	TT	325	259.8	16.9	7.55e-08	0.9
K	161.1	TT	350	256.4	-15	6.04e-08	1.3	1.4
L	161.1	TT	375	342.8	4.9	7.18e-08	1.3
A	161.15	NRM	0	51.5	51.4	6.75e-08	1.2	-1.6		N?
B	161.15	AF	3.6	344.8	-29.2	6.6e-08	1			Just noise. Upgraded from INT to N? dependin on the NRM and the pair sample 161.1
C	161.15	AF	8.1	345	2	7.21e-08	1.3
D	161.15	AF	12.2	11.1	-25.5	8.44e-08	1.1
E	161.15	AF	16.1	55.4	-8.7	9.63e-08	1
F	161.15	AF	26.9	355.6	-43.4	1.41e-07	1.1
G	161.15	AF	36.7	207	-12.8	8.55e-08	2
H	161.15	AF	46.3	36.5	-78.4	1.14e-07	1.7
I	161.15	AF	55.3	144.6	-0.9	1.72e-07	1.2
J	161.15	AF	64.1	144.7	-47.9	1.33e-07	1.5
K	161.15	AF	73.6	109	-43.7	1.78e-07	1.3
L	161.15	AF	82.8	96.4	13.9	1.13e-07	0.6
M	161.15	AF	92.2	115.6	-14.6	1.38e-07	1
N	161.15	AF	102.1	105	-23.9	9.99e-08	0.8
O	161.15	AF	117.5	130.4	-11.7	1.27e-07	1.1
A	162.35	NRM	0	273.7	-57.3	3.42e-07	5.3	150		N
B	162.35	TT	100	261.8	-67.5	2.91e-07	6.3			Sample is upside down and thermal seems to have altered the samples and resulted in a component away from origin, thus not considered viable here. Best endpoints are AF15-20
C	162.35	TT	150	251.2	-66.3	2.02e-07	7.8	151
D	162.35	AF	5	246.8	-64.2	1.83e-07	8.7
E	162.35	AF	8	246.2	-64.8	1.79e-07	8.8
F	162.35	AF	10	247.7	-66	1.7e-07	9.4
G	162.35	AF	15	247.4	-63.9	1.51e-07	10.9
H	162.35	AF	18	243.3	-67.3	1.43e-07	10.6
I	162.35	AF	20	242.1	-67.6	1.34e-07	11.3
J	162.35	TT	200	287.9	-71.5	1.4e-07	12.5
K	162.35	TT	225	311.8	-68.9	1.48e-07	12	155
L	162.35	TT	250	346.4	-56.2	1.77e-07	10.2
M	162.35	TT	275	2.1	-34.5	4.86e-07	4.4
N	162.35	TT	300	6.9	-34.6	7.69e-07	3.6	207
O	162.35	TT	325	14	-27.2	1.55e-06	3.3
A	162.65	NRM	0	1.6	78.9	2.84e-07	1	10.2		NP
B	162.65	AF	3.6	27	74.4	2.7e-07	1.2			Similar to sample 169.5, AF imparted spurious components and not considered viable here. The best components might be AF16.1 to 20.9.
C	162.65	AF	8.1	38.8	72.4	2.48e-07	1.3
D	162.65	AF	12.2	40.8	69.4	2.23e-07	1.3
E	162.65	AF	16.1	43.5	67.3	2.08e-07	1.3
F	162.65	AF	20.9	51.4	68.2	1.89e-07	1.3
G	162.65	TT	200	51	63.5	1.66e-07	1.3	10
H	162.65	TT	225	46.5	58.6	1.69e-07	1.3
I	162.65	TT	250	60.5	62.5	1.7e-07	1.3	11.3
J	162.65	AF	25	48.3	50.6	1.44e-07	1.4
K	162.65	AF	30	21	77.1	1.17e-07	1.4
L	162.65	AF	35	35	70.2	1.22e-07	1.5
M	162.65	AF	40	357	60.1	1.11e-07	1.5
N	162.65	AF	45	34.3	64.4	8.95e-08	1.7
O	162.65	AF	50	84.1	33.3	7.4e-08	1.6
P	162.65	AF	55	77.2	49.1	3.95e-08	2.2
Q	162.65	AF	60	92.5	45.6	4.79e-08	2.3
R	162.65	AF	65	59.5	43.1	4.07e-08	2.5
S	162.65	AF	70	87.4	49.4	4.92e-08	2.3
T	162.65	AF	75	161.9	60.8	6.24e-08	1.5
U	162.65	AF	80	145.5	38.5	6.76e-08	1.8
V	162.65	AF	30	169.2	8.3	6.73e-11	75.3
A	163.1	NRM	0	323.8	34.9	2.39e-07	1.2	7.7		INT
B	163.1	TT	150	327.2	27.8	2.05e-07	1.2			The duplicate AF3.6-12.2 are not considered. A gradual shallowing trend until flipped over at AF16.1 but then went crazy after AF20.9. R? based on the R trend; but the coming off direction of AF14-20.9 is 299decl 53incl and thus the remaining direction should be pointing positive. thus an INT is rated.
C	163.1	AF	3.6	327.2	24.7	1.76e-07	1.2
D	163.1	AF	8.1	324.7	10	1.6e-07	1.2
E	163.1	AF	12.2	309.1	4.4	1.33e-07	0.9
F	163.1	AF	3.6	310.5	6.4	1.38e-07	1
G	163.1	AF	8.1	312.1	4.3	1.31e-07	1.1
H	163.1	AF	12.2	314.8	8.4	1.36e-07	1.1
I	163.1	AF	14	321.1	10	1.23e-07	1.3
J	163.1	AF	16.1	324.6	-13.7	1.04e-07	1.2
K	163.1	AF	20.9	332.8	-17.2	8.79e-08	1.3
L	163.1	AF	28	352.8	13.2	1.12e-07	1.7
M	163.1	AF	30	345.6	24.6	1.37e-07	1.6
N	163.1	AF	35	13.3	5.2	8.33e-08	1.9
O	163.1	AF	40	53.3	32.9	2.71e-08	1.3
A	163.8	NRM	0	335.1	57.4	2.2e-07	1.1	7.4		N
B	163.8	TT	100	338	66.1	1.95e-07	1.1			Similar to sample 164.3, first thermal steps removed Brunhes and storage overprints; best endpoints are AF3.6-14.
C	163.8	TT	150	345.1	58.6	1.68e-07	1.1
D	163.8	TT	175	349.4	56.2	1.53e-07	1.1
E	163.8	AF	3.6	348.8	58.7	1.41e-07	1.2
F	163.8	AF	8.1	344.4	57.5	1.47e-07	1.3
G	163.8	AF	12.2	350.5	64.3	1.24e-07	1.3
H	163.8	AF	14	345.1	66.3	1.29e-07	1.3
I	163.8	AF	16.1	358.6	75.3	1.06e-07	1.3
J	163.8	AF	25	337.6	54.4	6.58e-08	1.3
K	163.8	AF	30	294	36.5	7.16e-08	1.1
L	163.8	AF	35	280.7	29.2	7.83e-08	1
M	163.8	AF	40	161.3	73.7	3.51e-08	1.9
A	164.3	NRM	0	215.6	72.8	1.7e-07	1.4			N
B	164.3	TT	100	216.1	75.8	1.35e-07	1.4			First thermal steps removed steep Brunhes component. Higher AF steps after AF8.1 are not considered viable here. Best endpoints are AF3.6-8.1
C	164.3	TT	150	212.6	65.1	9.95e-08	1.5	12
D	164.3	AF	3.6	199.6	64.2	9.7e-08	1.6
E	164.3	AF	5.8	197.5	59	7.5e-08	1.7
F	164.3	AF	8.1	188.5	43.9	8.17e-08	1.6
G	164.3	AF	12.2	162.3	50.4	8.12e-08	1.7
H	164.3	AF	14	147.3	56.4	4.93e-08	2.6
I	164.3	AF	16.1	180.5	31.7	3.58e-08	2.4
J	164.3	TT	200	29	77.8	1.15e-08	5.8
K	164.3	TT	225	14.7	2.8	6.69e-09	15.1	19.2
A	164.7	NRM	0	246.7	72.2	2.61e-07	1	11.1		N
B	164.7	TT	100	266.1	80.4	2.22e-07	1.1			Stayed pointing down with intensity gradually decling. First thermal steps removed a combination of present-day field and storage overprints. Steps AF12-16 might be the best endpoints
C	164.7	TT	150	236.1	82.6	1.87e-07	1
D	164.7	TT	175	229.2	86.8	1.7e-07	1.1
E	164.7	AF	3.6	184.2	83.1	1.68e-07	1.1
F	164.7	AF	8.1	194.6	82.5	1.64e-07	1
G	164.7	AF	12.2	203.3	81.6	1.52e-07	1
H	164.7	AF	14	206.9	82.9	1.43e-07	1.1
I	164.7	AF	16.1	206.3	80.7	1.36e-07	1.1
J	164.7	AF	25	174.8	87.8	9.75e-08	1.1
K	164.7	AF	30	224.4	81.3	8.31e-08	1.4
L	164.7	AF	35	242.7	83.4	8.39e-08	1.1
M	164.7	AF	40	237.9	73.6	7.62e-08	1.2
N	164.7	AF	45	299.3	82.8	5.9e-08	1.3
O	164.7	AF	50	296.3	77.4	6.27e-08	1.2
P	164.7	AF	55	353.9	64.9	4.28e-08	1.8
Q	164.7	AF	60	237.5	62.6	4.7e-08	1.3
A	165.05	NRM	0	290.5	-4.8	2.8e-07	0.9	6.3		INT	not tied to origin
B	165.05	TT	100	291.6	-2.3	2.68e-07	0.9			Stayed near-horizontal and no clear trend.
C	165.05	TT	150	291.1	0.5	2.61e-07	0.9
D	165.05	TT	175	292.5	-2.1	2.53e-07	0.9
E	165.05	TT	200	292.4	-1.1	2.5e-07	0.9	6
F	165.05	TT	200	292.4	-2.3	2.33e-07	0.9	6.2
G	165.05	TT	250	291.3	4.6	2.15e-07	0.9	6.2
H	165.05	TT	275	298.4	1.8	2.18e-07	0.8
I	165.05	TT	300	304.4	-14.8	1.64e-07	0.9	6.4
J	165.05	TT	325	303.6	-19.3	1.65e-07	0.8
K	165.05	TT	350	300.1	-7	1.76e-07	0.8	8.5
L	165.05	TT	375	302.3	0.7	1.88e-07	0.8
M	165.05	TT	400	306.1	-1.7	1.71e-07	0.7	11.6
A	165.5	NRM	0	123.2	68.3	1.02e-07	0.6	1.5		INT
B	165.5	TT	100	120.5	55.5	9.71e-08	0.6			Demag steps not trending toward the origin with intensity not dropping until TT320 and going crazy. N? is assigned here considering the steps before AF.
C	165.5	TT	150	126.5	39.3	9.81e-08	0.5	1.4
D	165.5	TT	175	125.1	37.1	1.14e-07	0.4
E	165.5	TT	200	115.8	33	1.12e-07	0.6	1.6
F	165.5	TT	225	116.3	31.4	1.14e-07	0.5	1.5
G	165.5	AF	3.6	113.4	43.5	1.36e-07	0.5
H	165.5	AF	8.1	105	37.9	1.24e-07	0.5
I	165.5	AF	12.2	108.2	39.7	1.05e-07	0.5
J	165.5	TT	250	106.7	39.9	1.16e-07	0.6	1.6
K	165.5	TT	275	99.3	33.3	1.32e-07	0.6
L	165.5	TT	300	108.1	41.1	1.54e-07	0.6	1.8
M	165.5	TT	320	55.5	26.6	3.93e-08	1.4
N	165.5	TT	340	80.4	-25.8	6.63e-08	1	1.9
O	165.5	TT	360	55.2	-9.5	8.26e-08	1	1.7
A	166.25	NRM	0	79.1	-38.3	1.18e-06	1.6	1.5		NPP
B	166.25	TT	100	77.5	-36.6	1.11e-06	1.6			Sample is upside down. Initial thermal steps gradually removing mixed Brunhes and storage overprints. AF12.2 and following steps might not be real again. N? is rated here due to shallow incl compared to early Cret. If not tired to origin, then the coming off direction is also positive and therefore the primary direction should be positive. upgraded from N? to NPP
C	166.25	TT	150	80.1	-37	1.04e-06	1.6	1.7
D	166.25	TT	175	78.3	-35.5	9.83e-07	1.5
E	166.25	TT	200	86.9	-36.4	9.25e-07	1.3	1.6
F	166.25	TT	225	84.8	-33.8	8.71e-07	1.4
G	166.25	TT	250	86.1	-32.5	8.32e-07	1.4	1.6
H	166.25	AF	3.6	89.3	-35.4	7.21e-07	1.4
I	166.25	AF	8.1	93.4	-40.7	4.65e-07	1.4
J	166.25	AF	12.2	82.4	-27.9	2.56e-07	1.5
K	166.25	AF	14	102.5	-25.1	2.12e-07	1.2
L	166.25	TT	275	102.3	-29	2e-07	1.2
M	166.25	TT	300	101.6	-29.9	1.83e-07	1.2	1
N	166.25	TT	325	103	-31.4	1.55e-07	1.4
O	166.25	TT	350	103.1	-37.5	1.76e-07	1.5	1.6
P	166.25	TT	375	63.1	-49.4	1.76e-07	1.8
Q	166.25	TT	400	100.7	-52	1.98e-07	1.5	20.1
A	166.75	NRM	0	60.5	82.4	1.39e-07	1.6	0.3		INT
B	166.75	AF	3.6	43.1	74.5	1.16e-07	1.6			Again, higher AF steps seem to be imparting spurious component and not considered here. The coming off direction of AF3.6-8.1 is 352decl 30 incl, the primary magnetization should thus be positive
C	166.75	AF	8.1	136.2	63	9.11e-08	1.7
D	166.75	AF	12.2	28	-18.8	3.72e-08	1.3
E	166.75	AF	16.1	280.7	54.6	7.42e-08	1.2
F	166.75	AF	26.9	329.9	-6.2	1.22e-07	1
G	166.75	AF	36.7	334.5	-13	1.1e-07	1.2
H	166.75	AF	46.3	57	56	7.53e-08	1.5
I	166.75	AF	55.3	326.3	7.1	1.06e-07	0.9
J	166.75	AF	64.1	17.5	-25.1	9.4e-08	1.4
K	166.75	AF	73.6	309.3	-47.6	1.58e-07	1.2
L	166.75	AF	82.8	265.4	-71.1	1.78e-07	1.3
M	166.75	AF	92.2	311.2	-46.2	2.29e-07	1.1
N	166.75	AF	102.1	243.2	-53.2	1.49e-07	1.3
O	166.75	AF	117.5	244.2	-53	1.62e-07	1.2
A	166.8	NRM	0	179.8	83.1	4.06e-08	1	2.7		N?
B	166.8	TT	100	205.7	80.3	4.98e-08	1			Similar to sample 169.5, AF steps and following ones not considered real signals here. Oddly, intensity keeps increasing while stay steep down. No trend toward R.
C	166.8	TT	125	242.3	77.7	6.25e-08	1.2	0.6
D	166.8	TT	150	302.8	80	7.3e-08	1.1
E	166.8	TT	175	302.6	79.1	9.82e-08	1
F	166.8	AF	1.8	309.5	76.6	9.92e-08	1.1
G	166.8	AF	3.6	12.8	70.3	1e-07	1.1
H	166.8	AF	8.1	20.8	73.7	1.13e-07	1.1
I	166.8	AF	12.2	11.9	57.2	1.27e-07	1.1
J	166.8	AF	16.1	357.7	52.5	1.59e-07	1.1
K	166.8	AF	26.9	13.6	51.6	1.66e-07	1.2
L	166.8	AF	36.7	2.6	64.9	1.28e-07	1.3
M	166.8	AF	46.3	31.3	62.9	1.08e-07	1.4
N	166.8	AF	55.3	93.5	73.6	1.57e-07	1.1
O	166.8	TT	225	94.1	77.3	1.8e-07	1
P	166.8	TT	225	101.5	79.1	1.85e-07	1.2
Q	166.8	TT	250	77.8	83.2	1.84e-07	1	0.8
R	166.8	TT	275	30.8	83.9	1.84e-07	1
S	166.8	TT	300	31.4	74.9	1.55e-07	1.1
T	166.8	TT	325	75	84	1.38e-07	1.1	2.1
U	166.8	TT	350	48.2	-43.5	2.37e-08	2.1	2.6
V	166.8	TT	375	13	-31.2	5.65e-08	1.1	2.7
A	167.2	NRM	0	37.9	61.7	8.55e-08	0.8	1.5		NP
B	167.2	TT	100	63.1	53.7	6.25e-08	1			similar to sample 169.5. AF steps and later thermal steps are not considered. TT150-175 are the best endpoints, but a bit shallow compared to the early Cret, probably due to consistent storage overprint.
C	167.2	TT	150	61.4	51.2	6.08e-08	0.9	1.1
D	167.2	TT	175	72.6	43.5	5.74e-08	0.8
E	167.2	TT	200	60.9	25.1	4.49e-08	1.1	0.9
F	167.2	TT	225	84.8	29.3	4.45e-08	0.5	1.2
G	167.2	AF	3.6	75.6	38	3.97e-08	1
H	167.2	AF	8.1	353.9	51.6	5.83e-08	1.5
I	167.2	AF	12.2	133.1	78.6	9.57e-08	1
J	167.2	TT	250	139.2	68.4	8.65e-08	0.9	1
K	167.2	TT	275	211.2	71.2	7.32e-08	1.2
L	167.2	TT	300	265.6	86.6	5.46e-08	0.9	1.9
M	167.2	TT	320	130.1	82.2	5.2e-08	1
N	167.2	TT	340	290.8	66.4	8.31e-08	1.2	2.5
O	167.2	TT	360	153.2	61.3	6.13e-08	0.8	2
A	168.4	NRM	0	325.4	59.2	2.72e-07	1.1	2.1		N
B	168.4	TT	100	326.7	64.6	2.58e-07	1.2			First thermal steps up to 200C removed mixed Brunhes and storage overprints until reaching the early Cret direction
C	168.4	TT	150	328.5	59.7	2.53e-07	1.2
D	168.4	TT	175	323.1	59.7	2.55e-07	1.1
E	168.4	TT	200	315.7	61.3	2.57e-07	1.2	1.7
F	168.4	TT	225	316.8	61.5	2.56e-07	1.2	1.9
G	168.4	TT	250	302.5	71.4	2.83e-07	1.2	2
H	168.4	TT	275	331.4	61.9	2.72e-07	1.1
I	168.4	TT	300	335.8	68.8	2.02e-07	1.3	1.9
J	168.4	TT	325	325.9	68.6	1.71e-07	1.1
K	168.4	TT	350	20.4	63	1.43e-07	1.1	1.9
L	168.4	TT	375	42.7	66.2	1.28e-07	1.2
M	168.4	TT	400	14.6	81.2	9.66e-08	1	13.1
A	169.3	NRM	0	163.2	70	1.76e-07	1.1	1.6		NP
B	169.3	TT	100	138.8	67.5	1.42e-07	1.1			Similar to sample 169.5, AF steps imparted spurious components and should not be considered here.
C	169.3	TT	150	136	63.6	1.11e-07	1.2
D	169.3	TT	175	140.7	54.1	1.04e-07	1.3
E	169.3	AF	3.6	136.3	45.1	9.64e-08	1.2
F	169.3	AF	8.1	141.4	36.4	1.05e-07	1.1
G	169.3	AF	12.2	118.4	24	1.22e-07	0.9
H	169.3	AF	14	141.3	36	1.07e-07	1.2
I	169.3	AF	16.1	113.3	15.9	1.24e-07	0.8
J	169.3	AF	25	183.2	55.6	1.5e-07	1.4			not tied to origin
K	169.3	AF	30	148.1	21.5	1.49e-07	1.2
L	169.3	AF	35	171.6	20.7	1.67e-07	1.4
M	169.3	AF	40	72.6	51.8	1.58e-07	1.2
A	169.5	NRM	0	245.6	66.8	1.35e-07	1.2	0.7		NP
B	169.5	TT	100	245.8	67.2	1.02e-07	1.2			AF steps and following thermal are not considered here due to the suspicious AF behaviors. The sample is nearly dead at TT200. Thus TT150-175 might be best endpoints.
C	169.5	TT	150	254.8	62.5	6.53e-08	1.2	0.8
D	169.5	TT	175	262.5	52.7	5.04e-08	1.4
E	169.5	TT	200	249.5	24.8	4.1e-08	2.3	0.5
F	169.5	TT	225	258.6	46.4	3.96e-08	1.4
G	169.5	TT	250	184.2	13.3	5.32e-08	2	0.5
H	169.5	AF	3.6	201.3	-19.2	5.16e-08	1.9
I	169.5	AF	8.1	208.6	-26.9	1.12e-07	1.6
J	169.5	AF	12.2	218.8	-15.9	9.19e-08	1.5
K	169.5	AF	14	196.4	-22.4	1.1e-07	1.7
L	169.5	TT	275	205.8	-20.2	1.04e-07	1.7
M	169.5	TT	300	213	-31.1	1.03e-07	1.8	0.4
N	169.5	TT	325	211.9	-25.2	8.8e-08	1.8
O	169.5	TT	350	223	-24.7	7.98e-08	1.7	0.4
P	169.5	TT	375	218.9	-43.4	3.1e-08	2.4
Q	169.5	TT	400	180.4	0.5	3.09e-08	2.1	1.8
A	170.95	NRM	0	199.8	84.7	1.54e-07	0.8	10.5		N
B	170.95	AF	3.6	168.1	76.3	1.35e-07	1.3			TT250 recorded a surge in mag susc with direction jumped and later AF steps again imparted spurious component and not considered. Otherwise, the first two AF steps removed a combination of brunhes and storage overpint until reaching an early Cret direction with endpoints at AF21-TT200-250
C	170.95	AF	8.1	154.7	79.4	1.32e-07	1.3
D	170.95	AF	12.2	153.9	71.8	1.61e-07	1.2
E	170.95	AF	16.1	190.2	64.9	1.38e-07	1.3
F	170.95	AF	20.9	174.5	66.2	1.01e-07	1.4
G	170.95	TT	200	188.2	62.9	7.7e-08	1.5	11.1
H	170.95	TT	225	213.7	82	7.42e-08	1.5
I	170.95	TT	250	9.4	72.5	6.48e-08	1.7	18.4
J	170.95	AF	25	109.4	81.3	6.95e-08	1.9
K	170.95	AF	30	252	44.9	1.7e-07	1
L	170.95	AF	35	204.1	58.3	2.75e-07	1
M	170.95	AF	40	123.2	59.9	2.43e-07	0.8
N	170.95	AF	45	264.4	59.8	2.43e-07	1.1
O	170.95	AF	47.5	267	33.9	1.49e-07	0.8
A	171.65	NRM	0	236	-41.9	1.24e-07	1.6	7.1		NP
B	171.65	AF	3.6	230.8	-49.6	1.33e-07	1.5			Sample is upside down. High AF steps (64 mT to 118 mT) seem to have imparted spurious magnetization onto the sample and thus not considered here. Otherwise, this is a good R -- first removing steep brunhes component plus near flat storage imprint until reaching the early Cret direction.
C	171.65	AF	8.1	221	-56.6	1.19e-07	1.5
D	171.65	AF	12.2	199.1	-58.6	1.18e-07	1.5
E	171.65	AF	16.1	199.7	-54.1	1.02e-07	1.5
F	171.65	AF	26.9	220.4	-55.9	6.8e-08	1.7
G	171.65	AF	36.7	235.6	-51	9.8e-08	1.4
H	171.65	AF	46.3	202.8	-41	8.41e-08	1.7
I	171.65	AF	55.3	207.1	-25.1	4.66e-08	2.1
J	171.65	AF	64.1	165.2	-1.2	1.25e-07	1.3
K	171.65	AF	73.6	208.8	-22.7	1.11e-07	1.8
L	171.65	AF	82.8	208.7	-19.6	9.98e-08	1.7
M	171.65	AF	92.2	205.7	-23.3	1.03e-07	1.7
N	171.65	AF	102.1	199.8	-18.2	1.19e-07	1.6
O	171.65	AF	117.5	212.8	-23.4	1.3e-07	1.6
A	172.2	NRM	0	271.8	48.5	1.82e-07	1	7.5		NPP
B	172.2	TT	100	264	55.6	1.39e-07	1			Stayed pointing steep down while intensity dropping. AF steps seem to have imparted spurious components with the next thermal steps getting rid of them until reaching probably the early Cret direction.
C	172.2	TT	150	254.2	51.9	1.08e-07	1	7.7
D	172.2	TT	175	253	54.2	9.41e-08	0.9
E	172.2	TT	200	241.1	48.2	9.09e-08	1.1	7.6
F	172.2	TT	225	237.8	43.6	7.84e-08	1
G	172.2	TT	250	234.9	38.1	9.85e-08	1.1	7.6
H	172.2	AF	3.6	229.3	45.7	9.73e-08	1
I	172.2	AF	8.1	212.8	40.9	1.03e-07	0.9
J	172.2	AF	12.2	175	47.2	5.76e-08	1
K	172.2	AF	14	145.8	65.9	7.73e-08	1
L	172.2	TT	275	186.4	56.9	7.74e-08	0.8
M	172.2	TT	300	179	60.6	7.04e-08	1	7.3
N	172.2	TT	325	128	50.6	6.21e-08	0.9
O	172.2	TT	350	105.7	45.2	6.38e-08	1	8
P	172.2	TT	375	336.5	-11.3	8.68e-08	1.4	14.8
A	173.4	NRM	0	106.7	60.4	1.99e-07	0.4	2.7		N?
B	173.4	TT	100	83.2	54.5	1.89e-07	0.6	7.8		mag susc surges upon heating while intensity keeps dropping. An apparent trend getting shallower then became noisy. N? is rated here depending on the context.
C	173.4	TT	125	86.6	50.5	1.65e-07	0.5	10.3
D	173.4	TT	150	86.8	48.1	1.47e-07	0.5
E	173.4	TT	175	85	46	1.3e-07	0.4
F	173.4	TT	200	82	45.7	1.21e-07	0.4
G	173.4	TT	225	85.7	42.4	1.18e-07	0.6
H	173.4	TT	250	92.1	30.9	1.19e-07	0.9	11.5
I	173.4	TT	275	83	24.9	1.14e-07	1	11.9
J	173.4	TT	300	94.6	18.9	1.12e-07	1.2	12.3
K	173.4	TT	325	72.6	13.8	6.74e-08	1.8
L	173.4	TT	350	68.6	3.8	7.18e-08	2.1	12.4
M	173.4	TT	375	41.2	21.4	6.41e-08	1.8
N	173.4	TT	375	39.4	18.2	7.15e-08	1.9			not tied to origin
O	173.4	TT	400	59.4	4.8	6e-08	3.1	14.7
P	173.4	TT	425	76.8	17.9	5.33e-08	1.9
Q	173.4	TT	450	39.8	-4.2	7.34e-08	1.9	17.7
A	174.2	NRM	0	11	43.8	4.05e-07	1.2	5.9		NP
B	174.2	TT	100	9.5	43.6	3.12e-07	1.2			Gradually removing storage and brunhes overprints but not reaching the ideal early Cret direction. Thus NP is rated here.
C	174.2	TT	150	10.9	52.6	2.41e-07	1.2	5.9
D	174.2	TT	175	14.1	46.2	2.24e-07	1.2
E	174.2	TT	200	11.9	44.9	2.28e-07	1.3	5.7
F	174.2	TT	225	16.3	44.3	2.06e-07	1.2
G	174.2	TT	250	9.6	41.3	2.11e-07	1.2	5.7
H	174.2	AF	3.6	16.1	38	2.02e-07	1.3
I	174.2	AF	8.1	10.3	36.8	1.82e-07	1.3
J	174.2	AF	12.2	14.8	38.8	1.65e-07	1.2
K	174.2	AF	14	19.6	42.3	1.51e-07	1.3
L	174.2	TT	275	11.5	52.8	1.59e-07	1.2
M	174.2	TT	300	16.2	42.3	1.67e-07	1.2	5.2
N	174.2	TT	325	3.8	50.4	1.6e-07	1.1
O	174.2	TT	350	43	62.6	7.54e-08	1.3	8.8
P	174.2	TT	375	11.6	33.9	9.05e-08	1.4
Q	174.2	TT	400	32.8	9.5	1.04e-07	1.6
A	175.5	NRM	0	56.7	69.2	3.74e-07	1.1	1		N
B	175.5	TT	100	56.4	63.7	3.46e-07	1			A good Normal -- gradually removing the present-day field and storage overprints before reaching the early Cret. Directions at TT325 to 375.
C	175.5	TT	150	67.1	66.5	3.19e-07	1
D	175.5	TT	175	53.6	58.9	3.13e-07	1.2
E	175.5	TT	200	53.8	57.5	3.14e-07	1.1	0.7
F	175.5	TT	225	53.4	57.2	3.12e-07	1.2	0.9
G	175.5	TT	250	57.8	62.9	3.04e-07	1	1.1
H	175.5	TT	275	63.5	67	2.73e-07	1.1
I	175.5	TT	300	78.1	72.6	2.79e-07	1.1	0.8
J	175.5	TT	325	68.5	71.9	2.87e-07	1.1
K	175.5	TT	350	60.8	71.8	2.71e-07	1.1	1.1
L	175.5	TT	375	60	72.5	2e-07	1.2
M	175.5	TT	400	43.8	77.7	1.47e-07	1.2	1.6
A	176.45	NRM	0	92.2	86.4	1.18e-07	0.9	1.9		R?
B	176.45	TT	100	60.8	76.7	9.9e-08	1			Start steep down and slight shallowing while turning counterclockwise. Rated as R? because the pair sample 176.5 is a good R.
C	176.45	TT	150	51.9	68.8	8.28e-08	1	1.7
D	176.45	TT	175	34.8	57.2	7.25e-08	1.3
E	176.45	TT	200	26.5	67.3	6.78e-08	1.2	1.8
F	176.45	TT	225	358.9	51.9	4.85e-08	1.7
G	176.45	TT	250	12.4	52.5	5.06e-08	1.8	1.8
H	176.45	AF	3.6	349.2	57.4	5.61e-08	1.4
I	176.45	AF	8.1	275.5	60.5	6.93e-08	1
J	176.45	AF	12.2	344.1	16.8	5.65e-08	1.9
K	176.45	AF	14	316.2	17.7	9.16e-08	1.2
A	176.5	NRM	0	204.2	33.6	9.57e-08	0.9	-2.4		RP
B	176.5	TT	100	222.5	1.1	1.03e-07	1.2	3.1		A good R trend -- start with positive incl and flipped over at TT125 until intensity went up at TT250 and jumping all over. Upgraded from RPP to RP
C	176.5	TT	125	216.1	-4.1	9.64e-08	1.2	5.4
D	176.5	TT	150	205.4	-13	9.73e-08	1.3
E	176.5	TT	175	190.6	-22.4	9.66e-08	1.4
F	176.5	TT	200	186	-30.1	9.6e-08	1.3
G	176.5	TT	225	168.3	-26.1	9.27e-08	1.4
H	176.5	TT	250	168.5	-7.1	1.52e-07	1.4	0.8
I	176.5	TT	275	161.2	-2	1.65e-07	1.3
J	176.5	AF	0	161.1	-0.5	1.73e-07	1.4
K	176.5	AF	3.6	153	7.3	1.59e-07	1.3
L	176.5	AF	8.1	181.1	18.3	1.38e-07	1.5
M	176.5	AF	12.2	237.2	57.9	8.98e-08	1.3
N	176.5	AF	16.1	148.8	38.5	6.06e-08	0.8			not tied to origin
O	176.5	AF	26.9	155.4	5.8	4.89e-08	1.9
P	176.5	AF	36.7	266.7	38	7.93e-08	1
Q	176.5	AF	46.3	165.1	51.9	4.16e-08	1
R	176.5	AF	55.3	250.1	77.7	1.05e-07	1.3
S	176.5	AF	64.1	345.4	27.9	1.45e-07	1.1
A	177.35	NRM	0	201.8	-20	3.1e-07	1.5	1.3		RP
B	177.35	TT	100	201.4	-28.2	2.69e-07	1.4			Stayed pointing up but shallow at around -30 deg. While counterclockwise shifted by ca. 40 deg.
C	177.35	TT	150	196.3	-27.5	2.49e-07	1.5
D	177.35	TT	175	188.9	-23.5	2.47e-07	1.4
E	177.35	TT	200	182.8	-22.5	2.43e-07	1.5	1
F	177.35	TT	225	177.4	-32.5	2.65e-07	1.4	1.2
G	177.35	TT	250	178.4	-29	2.48e-07	1.4	1.2
H	177.35	TT	275	173.7	-10.1	2.72e-07	1.5
I	177.35	TT	300	152.1	-19.1	7.56e-08	1.7	1.8
J	177.35	TT	325	161.2	-20.1	8.72e-08	1.5
K	177.35	TT	350	198	7.3	9.54e-08	2	2.3
A	178.4	NRM	0	257.9	2.7	1.29e-07	1	1		R
B	178.4	TT	100	262.8	0.1	1.2e-07	0.8			stayed near horizontal during first thermal steps until AF imparted some spurious magnetizaiton -- incl trending away from origion after TT175 and thus not consdered viable
C	178.4	TT	150	261.2	-1.6	1.26e-07	0.9	1
D	178.4	TT	175	261.1	-1.4	1.17e-07	0.8
E	178.4	TT	200	245.5	8.4	1.42e-07	1.2	1
F	178.4	TT	225	242	6.1	1.38e-07	1.2
G	178.4	TT	250	249.7	16.8	1.6e-07	1.3	0.7
H	178.4	AF	3.6	242.2	32.8	2.02e-07	1.2
I	178.4	AF	8.1	254.7	25.9	2.13e-07	1.1
J	178.4	AF	12.2	255.2	16	2.02e-07	1
K	178.4	AF	14	269.1	9.8	2.08e-07	0.7
L	178.4	TT	275	267.1	9.8	2.01e-07	0.9
M	178.4	TT	300	272.3	8.4	2.06e-07	0.7	0.8
N	178.4	TT	325	275.9	21.2	1.84e-07	0.9
O	178.4	TT	350	272.4	29.1	1.3e-07	0.9	0.9
P	178.4	TT	375	243.9	79.1	8.65e-08	1
Q	178.4	TT	400	237.4	38.4	6.59e-08	1.2	1.9
A	179.7	NRM	0	330.4	33.7	5.2e-08	1.3	2		RPP
B	179.7	TT	100	54.3	-15	3.89e-08	1.4			a very weak sample, flipped over immediately upon heating. R? upgraded to RPP
C	179.7	TT	150	330.6	-84.5	3.39e-08	1.4
D	179.7	TT	175	128.5	-67.1	1.92e-08	2.3
E	179.7	TT	200	331.8	-68.9	4.23e-08	0.8	1.7
F	179.7	TT	225	2	-36.6	6.18e-08	1	2
A	180.45	NRM	0	239	-41.3	1.2e-07	9	215		INT
B	180.45	TT	100	267.3	-65.4	9.26e-08	13			Sample upside down -- also a weak sample and the AF steps are suspious. Seemingly a shallowing trend.
C	180.45	TT	150	290.9	-32.1	5.84e-08	22.3	214
D	180.45	AF	3.6	275.3	-18.7	5.82e-08	23
E	180.45	AF	5.8	274.4	-31.7	5.17e-08	25.6
F	180.45	AF	8.1	276.1	-38.9	5.6e-08	23.6
G	180.45	AF	12.2	262.5	-78	3.81e-08	34
H	180.45	AF	14	170.3	-16	3.86e-08	28.5
I	180.45	AF	16.1	300.1	32.4	2.74e-08	45.8
A	180.9	NRM	0	274.7	-21.8	1.26e-07	0.4	7.8		R
B	180.9	TT	100	279.6	-15.8	1.03e-07	0.4			Sample upside down -- removing a steep up direction during first steps. Gradually shallowed until flipped ovr at TT225. RP is assigned here because no ideal early Cret. Direction is reached.
C	180.9	TT	150	282.5	-11.5	9.04e-08	0.5	7.8
D	180.9	TT	175	279.5	-5.2	7.16e-08	0.6
E	180.9	TT	200	279.8	-5.7	6.86e-08	0.7	7.7
F	180.9	TT	225	277.9	11.2	6.19e-08	0.9
G	180.9	TT	250	277.6	7.3	6.12e-08	1	7.8
H	180.9	AF	3.6	257.4	3.5	4.8e-08	1
I	180.9	AF	8.1	232	27.2	1.02e-07	1.2
J	180.9	AF	12.2	240.7	38.7	1.52e-07	1
K	180.9	AF	14	253.1	46.1	1.22e-07	1
L	180.9	TT	275	235.9	29.1	6.91e-08	1.1
M	180.9	TT	300	247.7	24.7	8.26e-08	0.8	7.2
N	180.9	TT	325	273.3	32.5	7.46e-08	1
O	180.9	TT	350	280.9	-50.5	3.29e-08	0.7	7.7		not tied to origin
P	180.9	TT	375	255.7	-47.9	1.37e-10	33.1
A	181.7	NRM	0	224.7	29.8	1.85e-07	1.6	2.5		N?
B	181.7	TT	100	232.6	40.4	1.4e-07	1.5			semi-clustering with relatively steep incl at ca. 45deg with intensity gradually decreasing.
C	181.7	TT	150	230.6	43.9	1.12e-07	1.5
D	181.7	TT	175	231.5	45.2	9.28e-08	1.5
E	181.7	TT	200	234.6	43.6	8.18e-08	1.5	2.5
F	181.7	TT	225	244.6	50.4	7.71e-08	1.5	2.4
G	181.7	TT	250	199.6	58.1	4.46e-08	1.5	2.7
H	181.7	TT	275	234.9	64.9	3.23e-08	1.8
I	181.7	TT	300	276.4	17.5	4.11e-08	2.1	2.4
A	182.55	NRM	0	326.8	14.6	1.27e-07	1.1	5.5		RP
B	182.55	TT	100	342.2	13.4	1.19e-07	1.2			Similar to sample 184.3 -- start positive and gradually shallowed until flipped over at AF3.6. RP is rated here due to no ideal early Cret directions
C	182.55	TT	150	350.3	5.4	1.13e-07	1.4	5.6
D	182.55	TT	175	354.1	5.5	1.19e-07	1.4
E	182.55	AF	3.6	353.7	-5.6	8.98e-08	1.4
F	182.55	AF	8.1	355.5	-15.7	9.17e-08	1.4
G	182.55	AF	12.2	352.6	-28.1	1.14e-07	1.4
H	182.55	AF	16.1	13	-18.7	1.41e-07	1.5
I	182.55	AF	25	30.7	12	1.21e-07	1.7
J	182.55	AF	30	12.8	-32.4	7.91e-08	1.3
K	182.55	AF	35	2	-23	1.02e-07	1.7
L	182.55	TT	225	354.1	-13.5	1.06e-07	1.4	5.7
M	182.55	TT	250	317	6.5	7.24e-08	1.3
N	182.55	AF	3.6	339.7	3.7	9.37e-08	1.5
O	182.55	AF	8.1	349.4	18.7	1.13e-07	1.5
P	182.55	AF	12.2	341.3	28.2	1.05e-07	1.5
Q	182.55	AF	14	334.7	36	9.24e-08	1.5
A	183.5	NRM	0	309.8	50.1	1.45e-07	1.1	9.1		INT
B	183.5	TT	150	316.9	46.7	1.38e-07	1.1			clustering with incl at ca. 50deg, no obviou trend and thus INT is given.
C	183.5	AF	3.6	321.7	47.3	1.3e-07	1.2
D	183.5	AF	8.1	326.6	53.1	1.25e-07	1.2
E	183.5	AF	12.2	315.9	57	1.06e-07	1.1
F	183.5	AF	3.6	311.8	55.1	1.05e-07	1.3
G	183.5	AF	8.1	312.8	56	1.01e-07	1.3
H	183.5	AF	12.2	322.1	43.9	9.91e-08	1.4
I	183.5	AF	14	314.8	54.8	1.02e-07	1.4
J	183.5	AF	16.1	49.8	64.5	5.42e-08	1.6
K	183.5	AF	20.9	55.3	59.8	6.32e-08	1.6
L	183.5	AF	28	239.1	70.3	5.36e-08	1.4
M	183.5	AF	30	296.4	26.1	1.34e-07	1
N	183.5	AF	35	303.6	25.5	1.29e-07	1
O	183.5	AF	40	287.3	22	1.26e-07	0.9
P	183.5	AF	45	298.9	21.7	1.21e-07	0.9
Q	183.5	AF	50	86.6	68.5	5.51e-08	1.3
A	184.3	NRM	0	22.8	17.9	4.04e-08	3.7	-2.6		RP
B	184.3	TT	100	50.2	-27.2	3.87e-08	2.8	2.8		A good R, although no ideal early Cret. Direction is retrieved. Start with shallow postive incl and flipped over immediately upon heating. Intensity gradually increases but mag susc stays stable and low -- a weak sample with very few paleomag carriers. The initial thermal steps managed to remove the Brunhes component (199 decl 58 incl) and used to re-orient back to depositional position.
C	184.3	TT	125	47.8	-33.4	4.64e-08	2.4	5.2
D	184.3	TT	150	43.8	-36.8	5.27e-08	1.7
E	184.3	TT	175	37.2	-44	5.68e-08	1.6
F	184.3	TT	200	18.5	-42.2	6.27e-08	1.5
G	184.3	TT	225	5.7	-37.7	7.39e-08	1.6
H	184.3	TT	250	353.2	-42.8	6.37e-08	1.5	0.8
I	184.3	TT	275	345.2	-28.4	7.94e-08	1.2
J	184.3	AF	0	343.5	-25.6	7.87e-08	1.2
K	184.3	AF	3.6	354.4	-28.9	8.95e-08	1.2
L	184.3	AF	8.1	355.5	-26.5	1.01e-07	1.2
M	184.3	AF	12.2	355.4	-24.9	1.68e-07	1.1
N	184.3	AF	16.1	356.4	-22.7	1.85e-07	1.1
O	184.3	AF	26.9	44.2	-45.9	1.11e-07	1.2
P	184.3	AF	36.7	343.5	-37.1	1.17e-07	0.9
Q	184.3	AF	46.3	352.8	-15.3	5.84e-08	1.2
R	184.3	AF	55.3	296.2	-40	1.05e-07	0.8
S	184.3	AF	64.1	194.1	26.3	2.29e-08	3.6
A	185.1	NRM	0	97.7	-24.4	5.17e-08	1.1	0.8		R
B	185.1	TT	100	104.9	-23.8	6.92e-08	0.9			Similar to 186.75 -- stayed negative and shallow, but with intensity going up, especially during the AF treatments, which could have imparted some spurious components -- the following thermal steps managed to take it off, and get it close to the early Cret. direction.
C	185.1	TT	150	105	-29.5	7.59e-08	0.8	0.3
D	185.1	AF	3.6	109.9	-30.6	9.93e-08	1
E	185.1	AF	8.1	94.1	-2.7	1.58e-07	0.7
F	185.1	AF	12.2	129.8	-4.7	1.4e-07	1
G	185.1	AF	16.1	117.5	-14.3	1.61e-07	1
H	185.1	TT	175	119.8	-19.1	1.5e-07	1
I	185.1	TT	200	118.6	-19.2	1.36e-07	1	0.3
J	185.1	TT	225	148.7	-35.6	7.9e-08	1.3	0.3
K	185.1	TT	250	175.4	-33.5	6.37e-08	1.6	0.4
L	185.1	TT	275	176.1	-53.9	6.79e-08	1.3
M	185.1	TT	300	358.5	-32.5	8.71e-08	0.9	0.5
N	185.1	TT	320	350.7	-11.1	7.01e-08	0.8
O	185.1	TT	340	112.4	11.2	9.69e-08	1	0.4
P	185.1	TT	360	78.9	17.3	9.48e-08	1.2	0.7
A	186.75	NRM	0	237.7	-14	1.56e-07	1.2	4		RP
B	186.75	TT	150	235.4	-15.5	1.31e-07	1.2			Start with negative incl but shallow; slightly move clockwise until going crazy after AF16.1. a permanent brunhes component is overprinted probably. Upgraded from RPP to RP.
C	186.75	AF	3.6	228.6	-19.7	1.27e-07	1.3
D	186.75	AF	8.1	238	-5.3	1.03e-07	1.2
E	186.75	AF	12.2	235.9	-13.9	9.26e-08	1.2
F	186.75	AF	3.6	244.4	-14.6	9.15e-08	1.2
G	186.75	AF	8.1	252.7	-14.3	8.53e-08	1.2
H	186.75	AF	12.2	258.1	-5.4	6.91e-08	1.2
I	186.75	AF	14	314.7	-28.2	7.8e-08	1.2
J	186.75	AF	16.1	332.7	-33.1	7.44e-08	1.2
K	186.75	AF	20.9	334.6	35	1.26e-07	1.4
L	186.75	AF	28	214.1	52.6	2.11e-07	1.2
M	186.75	AF	30	331.9	59.8	1.93e-07	1.3
N	186.75	AF	35	205	63.6	2.43e-07	1.2
O	186.75	AF	40	225.8	35.5	2.25e-07	1.3
A	187.1	NRM	0	52.1	63.7	5.79e-08	1.3	5.6		RP
B	187.1	TT	100	59.9	39.8	4.19e-08	1.9			A good R trend -- start with steep incl and flipped over at TT150C. The best endpoints are TT225 to AF5.
C	187.1	TT	150	57.7	-6.8	3.38e-08	2.5
D	187.1	TT	175	79.9	-16.8	3.69e-08	2.2
E	187.1	TT	200	45.4	-66.8	3.77e-08	1.8	5.4
F	187.1	TT	225	339.2	-79.8	5.14e-08	1.1	5.6
G	187.1	AF	5	304	-75.7	4.54e-08	1.3
H	187.1	AF	10	321.1	-24	5.17e-08	1.5
I	187.1	TT	250	317.5	-35	3.87e-08	1.9	5.8
J	187.1	TT	275	313.6	-2.4	2.47e-08	3.1
K	187.1	TT	300	219.5	56.4	3.61e-08	0.7	5.4
A	188.45	NRM	0	249.7	57.3	3.65e-07	1.1	9		N?
B	188.45	TT	100	270.1	76	2.84e-07	1			semi-clustering with steep incl. while slightly counterclockwise shift. Either N? or INT.
C	188.45	TT	150	266.5	55.9	2.05e-07	1.1	8.9
D	188.45	TT	175	237.9	76	1.58e-07	1
E	188.45	TT	200	246.1	67.3	1.25e-07	1.1	9.3
F	188.45	TT	225	225.7	74.8	1.14e-07	1
G	188.45	TT	250	250.7	61.6	1.32e-07	1	12.5
H	188.45	AF	3.6	241.2	61.9	1.26e-07	1.1
I	188.45	AF	8.1	243.2	68.5	1.17e-07	1.1
J	188.45	AF	12.2	206.7	66.3	1.22e-07	1.1
K	188.45	AF	14	205.1	53.6	1.29e-07	1
L	188.45	TT	275	219.4	66.4	1.09e-07	1
M	188.45	TT	300	216.7	60.7	1.07e-07	1	14
N	188.45	TT	325	16.6	47.8	3.91e-08	2
O	188.45	TT	350	351.6	42.3	4.57e-08	1.9	15.9		not tied to origin
A	189.1	NRM	0	307.1	51.3	2.48e-08	52.6	233		R?
B	189.1	AF	3.6	310	54.1	2.43e-08	54.1			Very weak sample. Gradually shallowing until getting too weak. Trend to be R?
C	189.1	AF	8.1	319.9	53.2	2.33e-08	57.5
D	189.1	AF	12.2	313.7	50.3	2.14e-08	61
E	189.1	AF	16.1	323.5	52.8	2.13e-08	62.7
F	189.1	AF	26.9	310.2	43.4	1.55e-08	71
G	189.1	AF	36.7	298.1	26.2	1.24e-08	72.4
H	189.1	AF	46.3	291.2	24	1.02e-08	74.6
I	189.1	AF	55.3	278.2	34.6	1.07e-08	74
J	189.1	AF	64.1	285.3	20.3	8.25e-09	77.3
K	189.1	AF	73.6	279.8	41	1.2e-08	72.5
L	189.1	AF	82.8	265.6	24.1	8.42e-09	76.6
M	189.1	AF	92.2	274.4	13.1	1.04e-08	72.2
N	189.1	AF	102.1	281.1	28.6	6.07e-09	81.2
O	189.1	AF	117.5	300.9	4	6.09e-09	80.8
A	189.8	NRM	0	283.8	45	1.42e-07	1	12.6		R?
B	189.8	TT	100	290.1	62.4	1.12e-07	1.2			Start with 45 deg incl and gradually steenpened until cross the origin. AF steps seem to have imparted some spurious magnetization. TT225 and higher thermal steps recorded a surge of mag susc and intensity and thus not reliable. Trend toward R? but never got there.
C	189.8	TT	150	314.7	82	5.92e-08	1.5	13
D	189.8	AF	3.6	4.4	74.2	5.43e-08	1.8
E	189.8	AF	5.8	56.7	74.1	5.89e-08	1.6
F	189.8	AF	8.1	75.1	83.6	5.47e-08	1.6
G	189.8	AF	12.2	38.3	64.8	7.04e-08	1.7
H	189.8	AF	14	36.3	47.1	7.28e-08	1.7
I	189.8	AF	16.1	26.4	34	7.64e-08	1.7
J	189.8	TT	200	4.2	32.9	6.84e-08	1.8
K	189.8	TT	225	359.7	-0.4	1.38e-07	2	25.6
L	189.8	TT	250	347.8	-11	1.57e-07	2.2
M	189.8	TT	275	358.8	-31.4	1.61e-07	2.4
N	189.8	TT	300	352.6	-30.4	1.88e-07	2.3	62.6
O	189.8	TT	325	6.8	-34.9	1.92e-07	2.6
P	189.8	TT	350	357.2	-31.9	2.5e-07	2.5	98.2
A	190.9	NRM	0	28.1	4.6	1.22e-07	1.6	17.6		R
B	190.9	AF	3.6	37.8	-2.4	1.33e-07	1.7			Start with near-horizontal incl and fliped over immediately after AF treatment. RPP is assigned due to no early Cretaceous endpoint Is reached
C	190.9	AF	8.1	30	-5.6	1.07e-07	1.7
D	190.9	AF	12.2	35	-25.1	1.18e-07	1.6
E	190.9	AF	16.1	57.7	-20.9	1.3e-07	1.7
F	190.9	AF	20.9	61.5	-17.4	1.07e-07	2
G	190.9	TT	200	5.1	-23.6	3.25e-07	1.9	54.7
H	190.9	TT	225	352.9	-19	4.62e-07	1.7	64.3
I	190.9	TT	250	329.1	-23.5	2.05e-07	2.8	60.6
J	190.9	AF	25	13.3	-13	2.68e-07	2.8
K	190.9	AF	30	353.4	-3.7	2.5e-07	2.7
L	190.9	AF	35	0.4	-40.5	1.84e-07	3.7
M	190.9	AF	40	9.9	-55.2	6e-08	19.4
N	190.9	AF	45	7.3	-12.8	3.43e-07	2.4
A	191.7	NRM	0	266.4	42.7	2.74e-07	1	14		NPP
B	191.7	TT	100	269.1	58.2	2.19e-07	1.1			Stayed steep down with intensity gradually going up (probably due to both alteration and AF imparting spurious field).
C	191.7	TT	150	264	77.4	2.08e-07	1.1	14
D	191.7	TT	175	270.9	55.6	1.93e-07	1
E	191.7	TT	200	261.7	53.1	1.91e-07	1	14.1
F	191.7	TT	225	274.1	57.8	1.94e-07	1.1
G	191.7	TT	250	261.8	46	2.1e-07	1	14.2
H	191.7	AF	3.6	270	47.8	2.26e-07	1
I	191.7	AF	8.1	277.6	47	2.48e-07	1
J	191.7	AF	12.2	265	57.3	2.61e-07	1.1
K	191.7	AF	14	269.5	55.5	2.72e-07	1.1
L	191.7	TT	275	271.4	63.4	2.79e-07	1.1
M	191.7	TT	300	267.7	62.2	2.8e-07	1.1	14.4
N	191.7	TT	325	267.3	63.6	2.57e-07	1.1
O	191.7	TT	350	276.2	64.5	2.3e-07	1.1	21.3
P	191.7	TT	375	32.5	-44.1	1.91e-06	2.9
A	192.5	NRM	0	253.8	85.8	1.9e-07	0.9	18.4		INT
B	192.5	TT	100	194.6	69.4	1.89e-07	1			Too noisy to have a trend toward normal or reversed
C	192.5	TT	150	204.6	65.6	1.71e-07	1
D	192.5	TT	175	230	25	1.04e-07	1
E	192.5	TT	200	265.7	75	2.07e-07	1.1	29.2
F	192.5	TT	225	228.5	78.6	2.22e-07	1.2	29.9
G	192.5	TT	250	242.4	75.8	2.44e-07	1.2	30.1
H	192.5	TT	275	236.8	62.3	2.06e-07	1.2
I	192.5	TT	300	247	62	2.74e-07	1.1	31.9
J	192.5	TT	325	273.3	73.7	2.43e-07	1.1
K	192.5	TT	350	301.6	47.7	1.75e-07	1.6	54.9
L	192.5	TT	375	345.9	60.1	2.61e-07	2
A	193.65	NRM	0	332	53.3	1.93e-07	1	26.5		INT
B	193.65	AF	3.6	341.1	62.2	1.89e-07	1.1			Again, AF steps seem to be imparting spurious field onto the sample -- noisy looking, and no clear trend to define a polarity
C	193.65	AF	8.1	2	66.3	1.69e-07	1.1
D	193.65	AF	12.2	357.4	69.9	1.68e-07	1
E	193.65	AF	16.1	32.3	78.5	1.75e-07	0.9
F	193.65	AF	26.9	18.4	82.1	1.46e-07	1.1
G	193.65	AF	36.7	81	63.8	1.04e-07	1.4
H	193.65	AF	46.3	340.4	84	1.2e-07	1
I	193.65	AF	55.3	307.5	73	1.03e-07	1.2
J	193.65	AF	64.1	163	75.9	1.25e-07	0.8
K	193.65	AF	73.6	157.3	52.5	8.8e-08	1.2
L	193.65	AF	82.8	196	53.2	1.07e-07	1.1
M	193.65	AF	92.2	87.1	76.1	8.36e-08	1.5
N	193.65	AF	102.1	149.3	46.2	9.11e-08	1.2
O	193.65	AF	117.5	167.4	55	9.51e-08	1.1
A	193.75	NRM	0	329.7	59.6	1.52e-07	1.5	40.6		INT
B	193.75	TT	100	11.9	72.3	1.62e-07	1.2			The stepwise thermal treatment lead to a gradual shallowing while turning clockwise; but then mag susc surged at 300C and the following Afs seems to again imparting spurious field onto the specimens and noisy looking.
C	193.75	TT	125	17.8	71.4	1.5e-07	1.4	38.5
D	193.75	TT	150	26.2	64.2	1.29e-07	1.8
E	193.75	TT	175	33.1	62.3	1.22e-07	1.8
F	193.75	TT	200	37.7	56.4	1.18e-07	2.1	44.6
G	193.75	TT	225	48.6	49.8	1.07e-07	2.6
H	193.75	TT	225	60.9	50.5	8.92e-08	3.4
I	193.75	TT	250	53.5	48.2	8.82e-08	4	47.2
J	193.75	TT	275	51.7	45.7	9.81e-08	3.7
K	193.75	TT	300	2.3	28.7	1.08e-07	3.6	73.4
L	193.75	AF	3.6	355.9	36.1	1.09e-07	4.2
M	193.75	AF	8.1	351.5	47.6	1e-07	4.7
N	193.75	AF	16.1	353.2	60.9	7.42e-08	5.7
O	193.75	AF	20.9	303.1	73.2	7.08e-08	5.8
P	193.75	AF	26.9	188.3	59.6	5.43e-08	6.9
Q	193.75	AF	40	11.9	-42.8	2.38e-07	2
R	193.75	TT	350	23.7	-27.9	4.2e-07	3.7	231
A	194.55	NRM	0	299.4	33.8	1.04e-07	13.7	239		RPP
B	194.55	AF	3.6	300.3	36.7	8.29e-08	14.7
C	194.55	AF	8.1	309.9	34	6.83e-08	17.6
D	194.55	AF	12.2	316.2	27.8	6.23e-08	19.1
E	194.55	AF	16.1	328.4	29	4.58e-08	24.4
F	194.55	AF	20.9	329.7	31.6	4.49e-08	24.7
G	194.55	TT	200	330.4	15.3	4.37e-08	26.9	235
H	194.55	TT	225	340.9	17.7	5.6e-08	20.1	235
I	194.55	TT	250	349.6	13.3	7.34e-08	15.4	238
J	194.55	AF	25	352.8	-8.8	6.2e-08	18.9
K	194.55	AF	30	4.6	-4.5	5.39e-08	21.4
L	194.55	AF	35	2.6	-20.7	6.69e-08	17.3
M	194.55	AF	40	10.9	-11.9	3.57e-07	2.1
N	194.55	AF	45	327.6	-60.7	4.25e-08	25.5
A	195.85	NRM	0	195.4	-72	2.1e-07	6.6	256		R?
B	195.85	AF	3.6	180.2	-72.1	2.28e-07	6			Sample is upside down. Good trend shallowing but never reach an endpoint.
C	195.85	AF	8.1	198	-71.6	2.44e-07	5.6
D	195.85	AF	12.2	205	-70.6	2.36e-07	5.8
E	195.85	AF	16.1	205	-69	2.1e-07	6.4
F	195.85	AF	26.9	204	-65.3	1.37e-07	9.6
G	195.85	AF	36.7	206.9	-58.6	6.71e-08	20.1
H	195.85	AF	46.3	258	-28.5	1.5e-08	68.1
I	195.85	AF	55.3	192.2	56.1	2.62e-08	41.4
J	195.85	AF	64.1	173.7	78	5.06e-08	25.1
K	195.85	AF	73.6	184.8	65.6	5.69e-08	21.2
L	195.85	AF	82.8	152.2	61.9	6.24e-08	19.6			not tied to origin
M	195.85	AF	92.2	165	71.1	7.96e-08	15.1
N	195.85	AF	102.1	103.8	78.5	9.64e-08	12.5
O	195.85	AF	117.5	121.8	79.9	7.92e-08	15.5
A	196.1	NRM	0	239.9	31.6	1.14e-07	2.3	39.4		RPP
B	196.1	AF	3.6	231.2	14.3	1.33e-07	2.3			Start pointing down and gradually turn to negative until going crazy at higher AF steps. AF12.2 might be the only endpoint
C	196.1	AF	8.1	230.6	-1.9	1.22e-07	2.6
D	196.1	AF	12.2	212.5	-11.7	1.4e-07	2.5
E	196.1	AF	16.1	206.1	-2.4	1.02e-07	2.9
F	196.1	AF	26.9	252.4	-2	1.13e-07	3
G	196.1	AF	36.7	197	-26.3	1.22e-07	2.6
H	196.1	AF	46.3	240.5	-24.1	1.49e-07	2.3
I	196.1	AF	55.3	194	22.3	1.06e-07	1.7
J	196.1	AF	64.1	211.4	-9.5	1.34e-07	2.2
K	196.1	AF	73.6	313.4	-18.4	3.98e-08	5.9
L	196.1	AF	82.8	253.8	51.8	1.18e-07	1.8
M	196.1	AF	92.2	233.7	38.5	8.47e-08	2.5
N	196.1	AF	102.1	77.1	43.8	7.29e-08	2.5
O	196.1	AF	117.5	164.6	22.8	1.37e-07	1.6
A	197.2	NRM	0	136.5	29.5	1.02e-07	6.5	97.1		RPP
B	197.2	TT	100	136.5	18.5	9.46e-08	6.6			Similar to sample 196.1. AF 8.1 might be the only endpoint
C	197.2	TT	150	133.8	9.3	9.71e-08	7	95
D	197.2	AF	3.6	123.6	0.4	9.93e-08	6.8
E	197.2	AF	5.8	124	0.3	1.02e-07	6.6
F	197.2	AF	8.1	131.9	-14.1	7.43e-08	8.4
G	197.2	AF	12.2	142.4	15.2	8.59e-08	7.4
H	197.2	AF	14	142.4	20.6	9.58e-08	6.7
I	197.2	AF	16.1	152.5	24.1	1.3e-07	4.6
J	197.2	TT	200	155.2	18.1	1.09e-07	5.7
K	197.2	TT	225	2.1	-52.6	4.04e-07	2.3	140
L	197.2	TT	250	330.2	-48.3	2.85e-07	3.4
M	197.2	TT	275	356.5	-50.5	3.68e-07	2.6
N	197.2	TT	300	359.2	-50.3	4.29e-07	2.5	177
O	197.2	TT	325	3.9	-57.7	4.36e-07	2.5
P	197.2	TT	350	358.4	-43	5.25e-07	2.5	223
A	198.5	NRM	0	268.6	66	9.82e-08	8.8	158		NPP
B	198.5	AF	3.6	282.2	74	9.2e-08	8.2			Very weak. no hint of reversing but instead looks either normal or heavily overprinted. Higher AF steps were messy and not viable.
C	198.5	AF	8.1	260.8	73.5	9.14e-08	8.2
D	198.5	AF	12.2	247.7	77	8.25e-08	8.9
E	198.5	AF	16.1	218.1	79.6	7.85e-08	9.4
F	198.5	AF	20.9	236.3	75.9	7.28e-08	10
G	198.5	TT	200	219.6	65.9	6.3e-08	11	159
H	198.5	TT	225	258.1	65.1	5.28e-08	13.8
I	198.5	TT	250	280	64	5.15e-08	14.7	163
J	198.5	AF	25	269	61.5	2.37e-08	36.9
K	198.5	AF	30	295.4	50.9	3.09e-08	28
L	198.5	AF	35	317	40.9	2.57e-08	33.1
M	198.5	AF	40	244.3	70.6	2.03e-08	45.8
N	198.5	AF	45	275.9	46.6	1.72e-08	50.1
O	198.5	AF	47.5	111.9	78.1	1.43e-08	60.5
A	199.4	NRM	0	76.5	57.2	2.65e-07	1.4	15		INT
B	199.4	TT	100	48	51.9	1.63e-07	1.6			Intensity starts to surge upon heating at 200C with demag path trending away from the origin and suspicious. Thus the thermal steps are not considered here due to potential alteration (brownish with high mag susc)
C	199.4	TT	150	37.3	44	1.3e-07	1.7	15
D	199.4	AF	3.6	40.6	48.2	1.07e-07	1.8
E	199.4	AF	5.8	28.5	39.3	9.94e-08	1.8
F	199.4	AF	8.1	17.9	37.5	1.13e-07	1.8
G	199.4	AF	12.2	0.1	39.6	9.76e-08	1.8
H	199.4	AF	14	358.7	33.7	9.56e-08	1.8
I	199.4	AF	16.1	12.2	46.5	1.07e-07	1.8
J	199.4	TT	200	6.3	-3.3	1.58e-07	1.9
K	199.4	TT	225	1.7	-16.2	1.99e-07	2
L	199.4	TT	250	356.5	-18	2.13e-07	2	42.7
M	199.4	TT	275	352.1	-22.7	1.58e-07	2.8
N	199.4	TT	300	358.3	-36	2.05e-07	2.5	72.6
O	199.4	TT	325	0.4	-35.8	2.2e-07	2.6
P	199.4	TT	350	350.3	-41.8	2.58e-07	2.2	97.7
A	200.4	NRM	0	116.6	61	3.37e-07	1.2			N
B	200.4	TT	100	106.7	61.2	2.7e-07	1.1
C	200.4	TT	150	105.2	58.9	2.11e-07	1.1			Slightly shallowed from 61 to 50 deg incl while staying toward the same declination, until gradually moving counterclockwise by ca. 100 deg. Stayed pointing steep down with intensity gradually declined. Last two steps are too weak and close to background noise level. AF16.1 to 30 might be the bes steps.
D	200.4	TT	175	103.5	59.5	1.88e-07	1.1
E	200.4	AF	3.6	101	56.4	1.57e-07	1.1
F	200.4	AF	8.1	100.8	49	1.38e-07	0.9
G	200.4	AF	12.2	94.4	56.5	1.29e-07	1.1
H	200.4	AF	14	96.1	51	1.34e-07	1.1
I	200.4	AF	16.1	73.8	51.7	9.6e-08	1.2
J	200.4	AF	25	66.1	55.2	7.11e-08	1.2
K	200.4	AF	30	48.5	54.1	9.32e-08	1.3
L	200.4	AF	35	32.1	67.3	8.42e-08	1.2
M	200.4	AF	40	14.7	64.1	4.57e-08	1.4
N	200.4	AF	45	238.5	28.4	2.73e-08	2.6			not tied to origin
A	201.1	NRM	0	175.2	42	6.47e-08	1.4	7.9		INT
B	201.1	TT	150	129.4	59.4	6.51e-08	1.4			AF treatments suspicious; intensity increases upon AF5. INT is rated here as no trend toward being reversed
C	201.1	AF	3.6	116.6	65.3	9.03e-08	1.2
D	201.1	AF	8.1	124.8	57	9.86e-08	1
E	201.1	AF	12.2	130.5	53.4	1.09e-07	0.9
F	201.1	AF	3.6	125.6	57.3	1.06e-07	1
G	201.1	AF	8.1	125.8	56.5	1.03e-07	1
H	201.1	AF	12.2	127.1	56.4	1.1e-07	1
I	201.1	AF	14	138.5	51.5	1.1e-07	1
J	201.1	AF	16.1	135.1	54.7	8.77e-08	1.1
K	201.1	AF	20.9	136.6	58.7	9.38e-08	1.1
L	201.1	AF	28	121.7	47.4	9.19e-08	1
M	201.1	AF	30	123.1	33	6.65e-08	1.4
N	201.1	AF	35	103.8	10.5	6.01e-08	1.5
O	201.1	AF	40	102	46.5	7.23e-08	1.3
A	202.05	NRM	0	31	71.9	1.15e-07	0.8	2.1		N?
B	202.05	AF	3.6	37.3	77.6	9.8e-08	0.9			Step AF12.2 is suspicious and not considered here. No trend toward being reversed; on the other hand, thermal pair (202.1) is rated as normal; therefore, N? is rated here.
C	202.05	AF	8.1	78.1	73.3	9.57e-08	0.8
D	202.05	AF	12.2	135.1	73.7	9.87e-08	0.8
E	202.05	AF	16.1	45.2	69	6.41e-08	0.9
F	202.05	AF	26.9	32.3	47.5	6.15e-08	1.1
G	202.05	AF	36.7	58.7	21.1	3.68e-08	1.3
H	202.05	AF	46.3	339.2	6.1	3.43e-08	1.6
I	202.05	AF	55.3	5.4	61	4.71e-08	1
J	202.05	AF	64.1	339.6	12.5	5.27e-08	1.6
K	202.05	AF	73.6	231.8	81.6	4.96e-08	0.9
L	202.05	AF	82.8	344.6	73.6	5.27e-08	0.9
M	202.05	AF	92.2	306.8	38.6	6.82e-08	0.8
N	202.05	AF	102.1	11.8	68.6	9.58e-08	1.1
O	202.05	AF	117.5	312.8	88.5	9.75e-08	0.9
A	202.1	NRM	0	317	58.4	2.19e-07	0.9	9.5		NP
B	202.1	TT	100	300.2	72.7	1.76e-07	0.9			Stays steep down, with no trend of shallowing or flipping over
C	202.1	TT	125	309.2	70.5	1.5e-07	0.8	3.1
D	202.1	TT	150	321.4	66.3	1.33e-07	0.9
E	202.1	TT	175	317.5	68.9	1.22e-07	0.7
F	202.1	TT	200	321.8	65.2	1.2e-07	0.7	4.8
G	202.1	TT	225	333.6	71.7	1.15e-07	0.7
H	202.1	TT	225	322.9	70.5	1.14e-07	0.7
I	202.1	TT	250	43.4	76.7	1.1e-07	0.9	5.7
J	202.1	TT	275	71.5	74.7	1.05e-07	1.1
K	202.1	TT	300	22.1	75.8	1.04e-07	1
L	202.1	TT	325	347.4	66	9.07e-08	1	8.4
M	202.1	TT	350	114.2	70.6	7.26e-08	0.9	9
N	202.1	TT	375	144.1	65.5	2.68e-08	2.5	14.8
O	202.1	TT	400	349.1	-24.5	9.69e-08	3.1
A	203.05	NRM	0	239.2	64	1.95e-07	1.1	5.5		NP
B	203.05	TT	150	238.6	63.6	1.7e-07	1.1			semi-clustering until slightly shallowed from 70deg to 40deg.
C	203.05	AF	3.6	232.9	63.3	1.61e-07	1.2
D	203.05	AF	8.1	233	72.2	1.59e-07	1.2
E	203.05	AF	12.2	210.9	74.9	1.48e-07	1.2
F	203.05	AF	3.6	213.4	75	1.42e-07	1.2
G	203.05	AF	8.1	204.3	76.6	1.41e-07	1.2
H	203.05	AF	12.2	215.9	72.3	1.37e-07	1.2
I	203.05	AF	14	217.5	66.3	1.2e-07	1.3
J	203.05	AF	16.1	225.6	59.6	1.33e-07	1.2
K	203.05	AF	20.9	215.6	63.3	1.3e-07	1.2
L	203.05	AF	28	229.4	49.4	1.19e-07	1.2
M	203.05	AF	30	200.8	38.7	1.3e-07	1.1
N	203.05	AF	35	199.8	10.5	5.4e-08	1.3			not tied to origin
O	203.05	AF	40	202.7	36.8	1.02e-07	1.3
A	204.15	NRM	0	292.5	72.9	1.3e-07	1.1	4.5		NP
B	204.15	TT	100	287.8	72.7	1.08e-07	1.3			Stays pointing steep down, although shallowed a bit
C	204.15	TT	150	287.4	69.9	8.08e-08	1.3
D	204.15	TT	175	306.2	69.1	8.39e-08	1.3
E	204.15	TT	200	322.1	61.6	5.4e-08	1.2	5.4
F	204.15	TT	200	359	54.7	4.44e-08	1.3	6.4
G	204.15	TT	250	18.7	40.2	6.22e-08	1.6	6.9
H	204.15	TT	275	6.8	42.9	2.2e-08	2
I	204.15	TT	300	349	-22.9	5.41e-08	1.6	10.2
J	204.15	TT	325	344.3	13.9	3.25e-08	2.1
K	204.15	TT	350	312.5	0	7.06e-08	1.4	13.3
A	205.1	NRM	0	354.6	60	2.78e-07	1.2	8.6		NP
B	205.1	TT	100	354.9	64.5	2.43e-07	1.3			Semi-clustering with steep-down incl. with no trend getting reversed
C	205.1	TT	150	357.5	56.7	2.12e-07	1.3	8.4
D	205.1	TT	175	3.4	54.4	2.09e-07	1.3
E	205.1	AF	3.6	350.9	47.5	1.81e-07	1.3
F	205.1	AF	8.1	358.5	49.7	1.73e-07	1.3
G	205.1	AF	12.2	8.6	44.8	1.71e-07	1.3
H	205.1	AF	16.1	18.1	54.5	1.53e-07	1.2
I	205.1	AF	25	358.5	57.6	1.32e-07	1.6
J	205.1	AF	30	220.7	81.9	1.03e-07	1.3
K	205.1	AF	35	301.9	51.2	1.93e-07	1.1
L	205.1	TT	225	303.2	32	2.22e-07	1.1
M	205.1	TT	250	264.1	22.6	4.16e-07	0.9	32.6
A	206.05	NRM	0	240.1	68.6	1.6e-07	1.2	11.5		NP
B	206.05	TT	150	235	72.8	1.37e-07	1.1			Semi-clustering toward steep-down, no trend to be shallowing/reversed
C	206.05	AF	3.6	242.2	68.7	1.23e-07	1.2
D	206.05	AF	8.1	245	67.5	1.11e-07	1.2
E	206.05	AF	12.2	236.9	57.4	1.12e-07	1.2
F	206.05	AF	3.6	235	58.2	1.16e-07	1.4
G	206.05	AF	8.1	234.6	60.2	1.09e-07	1.4
H	206.05	AF	12.2	235.8	52	1.12e-07	1.4
I	206.05	AF	14	255.3	64	1.11e-07	1.4
J	206.05	AF	16.1	266.7	61.9	1.29e-07	1.3
K	206.05	AF	20.9	286.9	65	1.05e-07	1.5
L	206.05	AF	28	208.5	58.4	1.1e-07	1.3
M	206.05	AF	30	204.2	80.4	1.36e-07	1.1
N	206.05	AF	35	150.1	81.3	1.44e-07	1.2
O	206.05	AF	40	4.7	59.1	8.27e-08	1.5
A	207.05	NRM	0	261.4	19.8	6.22e-08	1.2	-0.4		INT
B	207.05	AF	3.6	248.6	-24.9	4.5e-08	1.6			Sample is weak. And since AF could probably impart additional magnetization, this sample is thus considered noise. INT is rated here.
C	207.05	AF	8.1	301.5	32.9	3.87e-08	1.3
D	207.05	AF	12.2	269.2	0.1	6.59e-08	1.3
E	207.05	AF	16.1	292.9	39.4	6.32e-08	1.3
F	207.05	AF	26.9	288.6	68	7.37e-08	1.1
G	207.05	AF	36.7	268.4	30.5	1.07e-07	1.5
H	207.05	AF	46.3	225.5	-63.4	4.26e-08	1.8
I	207.05	AF	55.3	276.2	35	1.2e-07	1.2
J	207.05	AF	64.1	334.7	57.9	1.63e-07	1.2
K	207.05	AF	73.6	328.3	35.8	1.23e-07	1.3
L	207.05	AF	82.8	261.3	46.3	9.32e-08	1.1
M	207.05	AF	92.2	228.2	-32.4	9.88e-08	1.4
N	207.05	AF	102.1	246.7	72.8	9.84e-08	1.2
O	207.05	AF	117.5	304.4	22	5.05e-08	1.2
A	208.05	NRM	0	107.2	22.9	1.32e-07	2	3.4		R
B	208.05	TT	100	103.4	17.5	1.3e-07	1.6			Gradually shallowing upon heating and flipped over at TT200. A good R trend but early Cretaceous direction is not met. RP is rated here.
C	208.05	TT	150	105	11.5	1.02e-07	1.9	3.1
D	208.05	TT	175	106.7	10.5	7.8e-08	2
E	208.05	TT	200	116.2	-3.5	4.31e-08	2.3	3.3
F	208.05	TT	225	105.3	-12.7	2.8e-08	3.2	3.3
G	208.05	TT	250	113.4	-26.9	2.56e-08	2.9	3.3
H	208.05	TT	275	144.2	-40.7	2.61e-08	2.4
I	208.05	TT	300	212.9	-72.7	2.48e-08	2.6	5.6
J	208.05	TT	320	83	-4.7	4.52e-08	1.3
K	208.05	TT	340	32.7	-50.2	3.24e-08	2.6	14.5
L	208.05	TT	360	357.7	-42.3	4.59e-08	2.4	23
A	210.4	NRM	0	31.3	76.8	8.27e-08	1.1	7.4		INT
B	210.4	TT	100	60.5	68	5.81e-08	1.3			No clear trend to be normal or reversed.
C	210.4	TT	150	55.8	47.6	3.87e-08	1.9	7.5
D	210.4	TT	175	54.2	40.9	3.28e-08	2.1
E	210.4	TT	200	44.7	50.3	2.52e-08	2.1	7.5
F	210.4	TT	225	67	57.2	2.37e-08	2.6
G	210.4	TT	250	36.5	45.2	3.09e-08	2.5	7.5
H	210.4	AF	3.6	37.5	56.2	3.32e-08	2
I	210.4	AF	8.1	357.3	16.2	4.68e-08	1.8
J	210.4	AF	12.2	39	30.6	7.02e-08	1.8
K	210.4	AF	14	18.3	15.5	5.58e-08	2
L	210.4	TT	275	18.7	20	7.44e-08	1.7
M	210.4	TT	300	11.6	10.5	8.26e-08	1.8	6.9
A	211.05	NRM	0	319.2	70.3	3.16e-07	1	9.5		N?
B	211.05	AF	3.6	310.5	67.3	2.59e-07	1.3			semi-clustering toward steep-down until intensity surges after TT225 with mag susc triples
C	211.05	AF	8.1	306.7	64.4	2.3e-07	1.2
D	211.05	AF	12.2	304	64.1	2.1e-07	1.3
E	211.05	AF	16.1	304.6	72.1	1.71e-07	1.3
F	211.05	AF	20.9	311.1	69.5	1.47e-07	1.4
G	211.05	TT	200	330.3	63.9	1.31e-07	1.2	11.7
H	211.05	TT	225	284.7	55.7	1.14e-07	1.3
I	211.05	TT	250	352.3	41.3	1.41e-07	1.6	43.1
J	211.05	AF	25	359.2	59.4	1.31e-07	1.7
K	211.05	AF	30	296	3.4	2.43e-07	0.9
L	211.05	AF	35	138.3	-9.5	2.87e-07	1.3
M	211.05	AF	40	55.3	35.2	1.02e-07	2.3
N	211.05	AF	45	67	17.5	6.96e-07	1.1
A	212.25	NRM	0	191.1	-34.6	2.14e-07	1.5	9.1		R?
B	212.25	TT	100	192.3	-39.5	1.49e-07	1.6			Sample is upside down. Gradually shallowing from NRM to be near-horizontal at AF8 until going crazy with intensity surges.
C	212.25	TT	150	195.8	-26	1.15e-07	1.6
D	212.25	TT	175	203.3	-38.7	7.75e-08	1.9
E	212.25	AF	3.6	217.5	-24.4	6.94e-08	1.2
F	212.25	AF	8.1	208.9	-8.5	6.79e-08	1.1
G	212.25	AF	12.2	225.2	-25.6	6.37e-08	0.9
H	212.25	AF	14	236.3	-11.4	5.62e-08	1
I	212.25	AF	16.1	246.8	-22.2	5.96e-08	0.8
J	212.25	AF	25	259.6	11.5	2.96e-07	1
K	212.25	AF	30	262.1	-5.2	2.39e-07	0.9
L	212.25	AF	35	175.1	0.1	1.55e-07	1.5
M	212.25	AF	40	304.1	12.7	6.44e-08	1.2
A	213.05	NRM	0	268.6	-36.5	1.78e-07	0.9	10		R?
B	213.05	TT	150	273.1	-29.7	1.55e-07	0.7			Upside down. Gradually shallowing toward near-horizontal at AF28 and then steps go crazy and not considered here.
C	213.05	AF	3.6	272	-28.2	1.51e-07	0.7
D	213.05	AF	8.1	270.8	-20.5	1.44e-07	0.6
E	213.05	AF	12.2	266.6	-18	1.38e-07	0.7
F	213.05	AF	3.6	267.8	-18	1.38e-07	0.6
G	213.05	AF	8.1	268.2	-14.9	1.46e-07	0.6
H	213.05	AF	12.2	264.1	-17.4	1.38e-07	0.7
I	213.05	AF	14	267.5	-16.4	1.37e-07	0.6
J	213.05	AF	16.1	262.7	-7.4	1.12e-07	0.7
K	213.05	AF	20.9	261.4	-9.6	1.09e-07	0.5
L	213.05	AF	28	279	-0.2	9.39e-08	0.8
M	213.05	AF	30	281.9	-37.6	9.96e-08	0.6
N	213.05	AF	35	276.4	-47.8	8.61e-08	0.9
O	213.05	AF	40	273	6.5	8.3e-08	0.5
P	213.05	AF	45	311.2	-35	1.05e-07	0.7
A	214.25	NRM	0	231.8	34.1	7.14e-08	1.9	2		R?
B	214.25	TT	100	240.1	35.3	5.37e-08	2.3			Sample is weak and almost died at 200C. The AF steps seems to impart some spurious magnetization onto the sample and therefore steps after 225C are not considered here. Slightly shallowing to be near horizontal as heating to 175C, and R? is thus assigned here.
C	214.25	TT	150	231	16.3	3.43e-08	2.5	1.1
D	214.25	TT	175	231.1	2.4	2.5e-08	3.4
E	214.25	TT	200	242.1	20.6	2.19e-08	3.5	1.3
F	214.25	TT	225	341.2	50.5	3e-08	2.7	1.2
G	214.25	AF	3.6	242	-87.4	5.82e-08	1.9
H	214.25	AF	8.1	242	48.9	4.15e-08	1.4
I	214.25	AF	12.2	284	64.3	7.27e-08	1.1
J	214.25	TT	250	314	53.4	6.93e-08	1.5	1.1
K	214.25	TT	275	323.6	35.2	6.16e-08	1.3
L	214.25	TT	300	355.8	25.8	7.28e-08	2	1.3
M	214.25	TT	320	359.9	34.1	7.42e-08	1.6
N	214.25	TT	340	321.3	24.5	5.55e-08	1.1	1.2

## Sheet: TableDR4-Thermal IRM
Table DR4. Thermal IRM
IRM
Steps - 1) AF to 119 mT (demag steps not shown here);
applied	2) ARM at 80 mT AC and 100 μT DC;
	3) AF demag of ARM (5, 10, 15 mT, …						Thermal demag of the IRM
		until reaching 1/2 of the magnetization of ARM100μT)
Sample	STEP		MAG(A/m)				Sample (m)	Thermal Dm step/C		M(x)	M(y)	M(z)	Total (A/m)	Mag. Susc. (SI unit)
136.3	AD	119	4.7e-05				136.3	TD	0	0.11	0.0843	0.0328	0.142
136.3	ARM	80	0.0176				136.3	TD	100	0.0976	0.0687	0.0317	0.124
136.3	AD	5	0.017				136.3	TD	200	0.094	0.0479	0.0283	0.109
136.3	AD	10	0.0157				136.3	TD	250	0.0848	0.0481	0.0263	0.101
136.3	AD	15	0.0147				136.3	TD	300	0.0726	0.0528	0.0245	0.0931
136.3	AD	20	0.0127				136.3	TD	350	0.0707	0.0407	0.0225	0.0846
136.3	AD	25	0.0118				136.3	TD	375	0.0678	0.037	0.0178	0.0793	52.8
136.3	AD	30	0.00908				136.3	TD	400	0.0665	0.0315	0.0166	0.0755	54.3
136.3	AD	35	0.0054				136.3	TD	450	0.054	0.027	0.0143	0.0621	87.9
136.3	IRM	10	0.0197				136.3	TD	500	0.0453	0.0256	0.0123	0.0535
136.3	IRM	20	0.0463				136.3	TD	550	0.0373	0.0159	0.0097	0.0417	213.8
136.3	IRM	50	0.119				136.3	TD	575	0.0275	0.0119	0.0083	0.0311
136.3	IRM	100	0.166				136.3	TD	600	0.0155	0.00408	0.00628	0.0172
136.3	IRM	300	0.179				136.3	TD	650	0.00139	-0.00154	0.000842	0.00224
136.3	IRM	500	0.188				136.3	TD	675	0.00095	-0.00256	-0.00013	0.00273
136.3	IRM	800	0.19				158.1	TD	0	0.067	0.0804	0.0278	0.108	4.1
136.3	IRM	1000	0.189				158.1	TD	100	0.0553	0.074	0.0262	0.096
136.3	AD	15	0.121				158.1	TD	200	0.0391	0.0699	0.0244	0.0837
136.3	AD	20	0.0988				158.1	TD	225	0.0413	0.0651	0.0234	0.0806
136.3	AD	25	0.0862				158.1	TD	250	0.0358	0.0649	0.0209	0.077
							158.1	TD	275	0.0408	0.0572	0.0198	0.073
158.1	AD	119	3.68e-05				158.1	TD	300	0.0383	0.0555	0.0197	0.0702	6
158.1	ARM	80	0.0104				158.1	TD	325	0.0277	0.054	0.0148	0.0624	6.4
158.1	AD	5	0.0101				158.1	TD	350	0.0288	0.0466	0.0131	0.0563	7.2
158.1	AD	10	0.00928				158.1	TD	375	0.0287	0.045	0.0129	0.0549
158.1	AD	15	0.00803				158.1	TD	400	0.0251	0.0417	0.0112	0.05	10.2
158.1	AD	20	0.00666				158.1	TD	450	0.0177	0.0337	0.0093	0.0392	34
158.1	AD	25	0.00527				158.1	TD	500	0.0173	0.0283	0.0078	0.0341	35.3
158.1	AD	30	0.00404				158.1	TD	550	0.00707	0.0149	0.00419	0.0171	36.3
158.1	IRM	10	0.0151				158.1	TD	575	0.000245	2.9e-05	0.000617	0.000664
158.1	IRM	20	0.0301				158.1	TD	600	0.000139	1.9e-05	0.000334	0.000362	34.9
158.1	IRM	50	0.09				158.1	TD	650	3.8e-05	-1.8e-05	0.000293	0.000296
158.1	IRM	100	0.127				158.1	TD	675	0.000287	-0.000182	0.000293	0.000449
158.1	IRM	300	0.141				161.15	TD	0	0.0219	0.0223	0.0093	0.0326	-1.6
158.1	IRM	500	0.145				161.15	TD	100	0.0183	0.0213	0.009	0.0295
158.1	IRM	800	0.146				161.15	TD	200	0.0137	0.0188	0.00842	0.0248
158.1	IRM	1000	0.146				161.15	TD	225	0.0158	0.015	0.00825	0.0233
158.1	AD	5	0.132				161.15	TD	250	0.0133	0.0156	0.00789	0.0219
158.1	AD	10	0.111				161.15	TD	275	0.0128	0.0145	0.00688	0.0205
158.1	AD	15	0.0916				161.15	TD	300	0.0124	0.0132	0.00677	0.0194	0.5
158.1	AD	20	0.0729				161.15	TD	325	0.00988	0.013	0.0052	0.0171	0.7
158.1	AD	25	0.0578				161.15	TD	350	0.00758	0.0124	0.00446	0.0152	0.7
							161.15	TD	375	0.00564	0.0126	0.00447	0.0145
161.15	AD	119	9.02e-05				161.15	TD	400	0.00472	0.0115	0.00421	0.0132	1.4
161.15	ARM	80	0.00369				161.15	TD	450	0.00528	0.0087	0.00362	0.0108	2.8
161.15	AD	5	0.00353				161.15	TD	500	0.00364	0.00829	0.00294	0.00952	3.3
161.15	AD	10	0.00317				161.15	TD	550	0.00309	0.00532	0.00194	0.00646	3.4
161.15	AD	15	0.00279				161.15	TD	575	0.000694	0.000554	0.000737	0.00115
161.15	AD	20	0.00238				161.15	TD	600	0.0001	-4.9e-05	0.000542	0.000553
161.15	AD	25	0.00196				161.15	TD	650	0.000174	-3.8e-05	0.000498	0.000529	4.9
161.15	AD	30	0.00153				161.15	TD	675	0.000249	-0.000163	0.000436	0.000527
161.15	IRM	10	0.00521				166.75	TD	0	0.0388	0.0422	0.0189	0.0604	0.3
161.15	IRM	20	0.0107				166.75	TD	100	0.0309	0.0418	0.018	0.055
161.15	IRM	50	0.0268				166.75	TD	200	0.022	0.0404	0.0167	0.0489
161.15	IRM	100	0.0393				166.75	TD	225	0.0228	0.0381	0.0161	0.0472
161.15	IRM	300	0.046				166.75	TD	250	0.0187	0.0385	0.0155	0.0455
161.15	IRM	500	0.0474				166.75	TD	275	0.0219	0.0339	0.0148	0.043
161.15	IRM	800	0.0484				166.75	TD	300	0.0218	0.0312	0.0141	0.0406	2.2
161.15	IRM	1000	0.0481				166.75	TD	325	0.015	0.0302	0.0115	0.0356	2.8
161.15	AD	5	0.0412				166.75	TD	350	0.0132	0.0244	0.0085	0.029	2.9
161.15	AD	10	0.0334				166.75	TD	375	0.0115	0.0193	0.00747	0.0236
161.15	AD	15	0.028				166.75	TD	400	0.00718	0.0169	0.00554	0.0192	9.7
161.15	AD	20	0.0229				166.75	TD	450	0.007	0.0121	0.00433	0.0146	81.2
161.15	AD	25	0.0191				166.75	TD	500	0.00467	0.0106	0.00382	0.0122	88.1
							166.75	TD	550	0.00381	0.00565	0.00231	0.00719	69.1
166.75	AD	119	3.86e-07				166.75	TD	575	0.000659	0.00103	0.00092	0.00153
166.75	ARM	80	0.00473				166.75	TD	600	0.000115	1.4e-05	0.000337	0.000357
166.75	AD	5	0.00457				166.75	TD	650	0.000208	0.000113	0.0004	0.000465	34.5
166.75	AD	20	0.00313				166.75	TD	675	-8.2e-05	-3.6e-05	-0.000382	0.000393
166.75	AD	25	0.00253				171.65	TD	0	0.0863	0.107	0.0375	0.142	7.1
166.75	AD	30	0.00195				171.65	TD	100	0.0756	0.099	0.0345	0.129
166.75	IRM	10	0.006				171.65	TD	200	0.0625	0.0895	0.0314	0.114
166.75	IRM	20	0.013				171.65	TD	225	0.0395	0.0984	0.0302	0.11
166.75	IRM	50	0.0436				171.65	TD	250	0.0609	0.0821	0.0303	0.107
166.75	IRM	100	0.0677				171.65	TD	275	0.052	0.0833	0.0287	0.102
166.75	IRM	300	0.0785				171.65	TD	300	0.0327	0.0884	0.0273	0.0982	12.8
166.75	IRM	500	0.0806				171.65	TD	325	0.0442	0.0773	0.0253	0.0925	13.3
166.75	IRM	800	0.0817				171.65	TD	350	0.0362	0.0731	0.0194	0.0839	13.5
166.75	IRM	1000	0.0805				171.65	TD	375	0.0321	0.0694	0.0175	0.0785
166.75	AD	15	0.0548				171.65	TD	400	0.0243	0.0685	0.0157	0.0743	15.9
166.75	AD	20	0.0459				171.65	TD	450	0.0138	0.0612	0.0134	0.0642	33.8
166.75	AD	25	0.037				171.65	TD	500	0.0203	0.0506	0.0109	0.0556	64.5
							171.65	TD	550	0.0086	0.0298	0.0065	0.0317	107
171.65	AD	119	0.000176				171.65	TD	575	0.000876	0.000458	0.000865	0.00131
171.65	ARM	80	0.0147				171.65	TD	600	8.4e-05	-0.000289	0.000359	0.000468
171.65	AD	5	0.0142				171.65	TD	650	0.000333	-0.000192	0.000417	0.000567	189.7
171.65	AD	20	0.00953				171.65	TD	675	0.000219	-1.6e-05	0.000389	0.000447
171.65	AD	25	0.0076				189.1	TD	0	0.00877	0.01	0.00582	0.0146	233
171.65	AD	30	0.00573				189.1	TD	100	0.00627	0.00858	0.00492	0.0117
171.65	IRM	10	0.0178				189.1	TD	200	0.00405	0.00639	0.00347	0.00832
171.65	IRM	20	0.0422				189.1	TD	225	0.00346	0.00586	0.00316	0.00751
171.65	IRM	50	0.125				189.1	TD	250	0.00307	0.00514	0.0029	0.00666
171.65	IRM	100	0.173				189.1	TD	275	0.00291	0.00462	0.00241	0.00597
171.65	IRM	300	0.192				189.1	TD	300	0.00278	0.00369	0.0019	0.005	236
171.65	IRM	500	0.196				189.1	TD	325	0.00223	0.00369	0.00153	0.00458	253
171.65	IRM	800	0.197				189.1	TD	350	0.00226	0.00126	0.00128	0.00289	289
171.65	IRM	1000	0.197				189.1	TD	375	0.00251	0.00103	0.00096	0.00288
171.65	AD	15	0.126				189.1	TD	400	0.00291	0.00154	0.00065	0.00336	524
171.65	AD	20	0.101				189.1	TD	450	0.00291	-0.0065	-1e-05	0.00713	767
171.65	AD	25	0.0777				189.1	TD	500	0.0157	-0.0356	-0.0134	0.0412
							193.65	TD	0	0.0523	0.0683	0.0338	0.0925	26.5
189.1	AD	119	1.45e-08				193.65	TD	100	0.043	0.0583	0.0313	0.0789
189.1	ARM	80	0.0017				193.65	TD	200	0.0334	0.0504	0.027	0.0662
189.1	AD	5	0.00144				193.65	TD	225	0.0269	0.0503	0.0248	0.0622
189.1	AD	20	0.000882				193.65	TD	250	0.0285	0.0464	0.0244	0.0597
189.1	AD	25	0.000686				193.65	TD	275	0.0229	0.0464	0.0226	0.0565
189.1	IRM	10	0.00209				193.65	TD	300	0.0277	0.0395	0.0213	0.0527	66.1
189.1	IRM	20	0.00454				193.65	TD	325	0.0181	0.0399	0.0179	0.0473	78.4
189.1	IRM	50	0.0113				193.65	TD	350	0.0148	0.0355	0.0133	0.0407	113
189.1	IRM	100	0.0159				193.65	TD	375	0.0124	0.0318	0.0119	0.0362
189.1	IRM	300	0.019				193.65	TD	400	0.0164	0.0264	0.0108	0.0329	515
189.1	IRM	500	0.0198				193.65	TD	450	0.0086	0.0232	0.0082	0.0261
189.1	IRM	800	0.0201				193.65	TD	500	0.00976	0.0155	0.00567	0.0192
189.1	IRM	1000	0.0203				193.65	TD	550	0.00491	0.00348	0.00199	0.00634
189.1	AD	15	0.0138				193.65	TD	575	0.00179	-0.00543	0.00033	0.00572
189.1	AD	20	0.0117				193.65	TD	600	-0.00054	-0.00394	-0.00139	0.00422
189.1	AD	25	0.0098				193.65	TD	650	0.00186	-0.00306	-0.00127	0.0038	313.8
							193.65	TD	675	0.00258	-0.00411	-0.00246	0.00544
193.65	AD	119	2.24e-07				195.85	TD	0	0.0733	0.0608	0.0364	0.102	256
193.65	ARM	80	0.01				195.85	TD	100	0.0638	0.0516	0.0333	0.0885
193.65	AD	5	0.00941				195.85	TD	200	0.0403	0.0554	0.0287	0.0743
193.65	AD	20	0.00552				195.85	TD	225	0.0394	0.0504	0.0266	0.0693
193.65	AD	25	0.00434				195.85	TD	250	0.0327	0.0516	0.0254	0.0662
193.65	IRM	10	0.0154				195.85	TD	275	0.0351	0.0447	0.0241	0.0617
193.65	IRM	20	0.0309				195.85	TD	300	0.0315	0.0422	0.0221	0.0571	252
193.65	IRM	50	0.074				195.85	TD	325	0.0243	0.0386	0.0178	0.049	334
193.65	IRM	100	0.106				195.85	TD	350	0.0204	0.0344	0.015	0.0428	445
193.65	IRM	300	0.126				195.85	TD	375	0.0182	0.0281	0.0123	0.0357
193.65	IRM	500	0.131				195.85	TD	400	0.0174	0.0179	0.00935	0.0267	684
193.65	IRM	800	0.134				195.85	TD	450	0.017	-0.003	0.0023	0.0174
193.65	IRM	1000	0.134				195.85	TD	500	0.0264	-0.0107	0.0026	0.0286
193.65	AD	15	0.0892				196.1	TD	0	0.0321	0.0293	0.0183	0.0472	39.4
193.65	AD	20	0.0745				196.1	TD	100	0.0255	0.0271	0.016	0.0405
193.65	AD	25	0.0628				196.1	TD	200	0.0193	0.023	0.014	0.0331
							196.1	TD	225	0.0173	0.022	0.0129	0.0309
195.85	AD	119	1.02e-07				196.1	TD	250	0.0165	0.0209	0.0126	0.0295
195.85	ARM	80	0.0112				196.1	TD	275	0.0167	0.0188	0.0118	0.0277
195.85	AD	20	0.00595				196.1	TD	300	0.0149	0.018	0.0112	0.0259	82.9
195.85	AD	25	0.00448				196.1	TD	325	0.0113	0.015	0.00726	0.0201	123
195.85	IRM	10	0.0173				196.1	TD	350	0.0082	0.0139	0.00615	0.0173	237
195.85	IRM	20	0.0373				196.1	TD	375	0.00929	0.0108	0.00589	0.0154
195.85	IRM	50	0.0889				196.1	TD	400	0.0115	0.00604	0.00535	0.014	550
195.85	IRM	100	0.114				196.1	TD	450	0.00605	0.00505	0.00523	0.00946
195.85	IRM	300	0.123				196.1	TD	500	0.0112	-0.00859	0.00277	0.0144
195.85	IRM	500	0.125				202.05	TD	0	0.0417	0.0516	0.0196	0.0692	2.1
195.85	IRM	800	0.127				202.05	TD	100	0.0392	0.0437	0.0183	0.0615
195.85	IRM	1000	0.127				202.05	TD	200	0.0256	0.042	0.017	0.052
195.85	AD	20	0.055				202.05	TD	225	0.025	0.0398	0.0162	0.0497
196.1	STEP		MAG(A/m)				202.05	TD	250	0.027	0.0357	0.0154	0.0473
196.1	AD	119	3.24e-07				202.05	TD	275	0.0205	0.0366	0.0145	0.0444
196.1	ARM	80	0.00443				202.05	TD	300	0.0232	0.0313	0.0136	0.0413	5.7
196.1	AD	20	0.00243				202.05	TD	325	0.0191	0.0265	0.0075	0.0335	6.3
196.1	AD	25	0.00192				202.05	TD	350	0.0145	0.0257	0.0068	0.0303	8.4
196.1	IRM	10	0.00812				202.05	TD	375	0.0119	0.0244	0.0063	0.0279
196.1	IRM	20	0.016				202.05	TD	400	0.0113	0.0209	0.0053	0.0243	29.2
196.1	IRM	50	0.0373				202.05	TD	450	0.0075	0.0156	0.00403	0.0178	37.9
196.1	IRM	100	0.0531				202.05	TD	500	0.00412	0.00942	0.00251	0.0106	39
196.1	IRM	300	0.0638				202.05	TD	550	0.00109	0.00204	0.00098	0.00251	40
196.1	IRM	500	0.0671				202.05	TD	575	0.000139	5.7e-05	0.000263	0.000303
196.1	IRM	800	0.0684				202.05	TD	600	0.000268	-0.000183	7.2e-05	0.000333
196.1	IRM	1000	0.0692				202.05	TD	600	-8e-05	9.9e-05	0.000258	0.000288
196.1	AD	15	0.0426				202.05	TD	650	0.000133	-4.73e-05	8.7e-05	0.000166	51.5
196.1	AD	20	0.0352				202.05	TD	675	0.000158	-7.24e-05	3.49e-05	0.000177
196.1	AD	25	0.0297				207.05	TD	0	0.0268	0.0271	0.0162	0.0414	-0.4
							207.05	TD	100	0.0168	0.0302	0.0141	0.0374
202.05	AD	119	2.31e-07				207.05	TD	200	0.0117	0.0263	0.0123	0.0313
202.05	ARM	80	0.00654				207.05	TD	225	0.0132	0.0231	0.0125	0.0295
202.05	AD	15	0.00489				207.05	TD	250	0.0131	0.0218	0.011	0.0277
202.05	AD	20	0.00404				207.05	TD	275	0.0133	0.0188	0.0109	0.0255
202.05	AD	25	0.00316				207.05	TD	300	0.00988	0.0166	0.00691	0.0205	1.8
202.05	AD	30	0.00234				207.05	TD	325	0.00801	0.014	0.00502	0.0169	2.1
202.05	IRM	10	0.00817				207.05	TD	350	0.00703	0.0123	0.00458	0.0149	2.3
202.05	IRM	20	0.0185				207.05	TD	375	0.00557	0.0117	0.00364	0.0135
202.05	IRM	50	0.0554				207.05	TD	400	0.00545	0.00935	0.00328	0.0113	3.1
202.05	IRM	100	0.081				207.05	TD	450	0.00324	0.00641	0.00208	0.00748	4.4
202.05	IRM	300	0.0944				207.05	TD	500	0.0019	0.00335	0.00141	0.0041	4.9
202.05	IRM	500	0.0974				207.05	TD	550	0.000233	9.9e-05	0.000478	0.000541	6.4
202.05	IRM	800	0.0988
202.05	IRM	1000	0.0991
202.05	AD	15	0.0632
202.05	AD	20	0.0514
202.05	AD	25	0.0416
207.05	AD	119	5.28e-05
207.05	ARM	80	0.00392
207.05	AD	15	0.00284
207.05	AD	20	0.00245
207.05	AD	25	0.00192
207.05	AD	30	0.00145
207.05	IRM	10	0.00473
207.05	IRM	20	0.0104
207.05	IRM	50	0.0294
207.05	IRM	100	0.0449
207.05	IRM	300	0.0549
207.05	IRM	500	0.0571
207.05	IRM	800	0.058
207.05	IRM	1000	0.0581
207.05	AD	15	0.0382
207.05	AD	20	0.0317
207.05	AD	25	0.0268

## Sheet: Table DR5_base Aptian_ages
Table DR5. Ages for three proposed markers for defining the Barremian-Aptian boundary (highlighted in green), which are also noted in Figure 3 of the main text. Note that the durations of the ammonite zones are from the cyclostratigraphy presented in EGU2020 by Martinez et al.
Horizon	Age (Ma)		Duration (kyr)
			This work	1Malinverno et al (2012)	2Malinverno et al (2010)	3Huang et al (2010)	4Sprovieri et al (2006)	5Fiet and Gorin (2000)	6Herbert (1992)
base OAE1a	120.394	=120.7-298kyr
Top M0r–base OAE1a duration			298		298 ±15	400			350-500
Top M0r	120.692	=121.2-500kyr
M0r duration			500	590 ±41	490 ±25	500	200	350 ±40	350-500
base M0r	121.192	±0.4*
M1n duration			1850	1970 ±176			1850	2280 ±240	2475-3100
base M1n	123.042	=123.1-(290-232)kyr
Svalbard Bentonite U-Pb age7	123.1	±0.3
80% up M1r -- duration♮			232
M1r duration			290	410 ±75			290	430 ±210
Top Mid-Barremian Event	123.332	=ca. Base M1r in Gorgo a Cerbara section according to Sprovieri et al (2006) = ca. base T. vandenheckii according to Martinez et al. (2020)
base M1r	123.332	=123.1+0.232
Ammonites	Base Age (Ma)	#Cycle-duration (myr)
D. forbesi	120.272
Deshayesites Oglanlensis	120.792	0.52
Martelites Sarasini	121.192	0.4
Imerites giraudi	121.342	0.15
Gerhardtia sartousiana	122.322	0.98
Toxancyloceras vandenheckii^	123.332	1.01
1 based on Bayesian simulations of sedimentation rates of Cismon core resistivity data by matching three eccentricities (periods of 404, 124, and 94.9 ka), obliquity (37 ka), and a broad interval for precession (centered on 20.3 ka) from the orbital solution of Laskar et al. (2004)
2 based on an optimal geomagnetic polarity time scale to minimize spreading rate fluctuations in many ridge systems
3 based on 100-kyr tuning of Cismon core CaCO3 content data
4 based on 400-kyr tuning of δ13C data from Umbria-Marche composite section
5 based on assigning precession/eccentricity to marl-limestone couplets/bundles in Gorgo a Cerbara section
6 based on assigning precession/eccentricity to marl-limestone couplets/bundles in three Italian sections, Gorgo a Cerbara, Cismon, and Apecchio
7 according to Midtkandal et al (2006)
* age from this work -- =123.1-(290-232)kyr-1850kyr; uncertainty of an inherent 0.3 myr from the U-Pb precision and of ca. 0.1 myr from the cycle durations of M1 in Sprovieri et al. (2006)
♮ the Svalbard bentonite U-Pb age lies at ca. 80% up M1r according to the Magnetostratigraphy in this work
# based on Martinez et al. (2020) and pers. comm. 2020
^ Base T. vandenheckii == base M1r according to Sprovieri et al (2006)
